# Supplementary material
Source: publisher figshare collection journal article supplement (https://gsapubs.figshare.com/ndownloader/files/22411401)
Supplement: Supplementary file 1 [file 22411401]

## SUPPLEMENTAL ITEMS

*For* Witkosky and Wernicke, Subsidence history of the Ediacaran Johnnie Formation and related strata of southwest Laurentia: implications for the age and duration of the Shuram isotopic excursion and animal evolution

Figure S1: (A) and (B) Annotated Google Earth images of Johnnie Wash

Figure S2: Carbon and oxygen isotope ratios versus stratigraphic height and cross plots for each individual carbonate interval (16 total)

Figure S3: Chemostratigraphic comparisons of Johnnie Formation with Huqf Supergroup below Shuram excursion (8 plots)

Figure S4: Subsidence plot  $Y(t)$ , assuming no Pahrump substrate and density variation of  $\pm 5\%$

Figure S5: Subsidence plot  $Y(t)$ , assuming no Pahrump substrate, intermediate density, and variable characteristic time  $\tau$

Figure S6: Subsidence plot  $Y(S)$ , assuming intermediate sediment grain density and Pahrump substrate

Table S1: Carbon and oxygen isotopic samples and data

Table S2: Age estimates of pre-541 Ma strata, assuming hypothetical Pahrump substrate

Supplemental text: Lithostratigraphic unit descriptions for Mt. Schader section

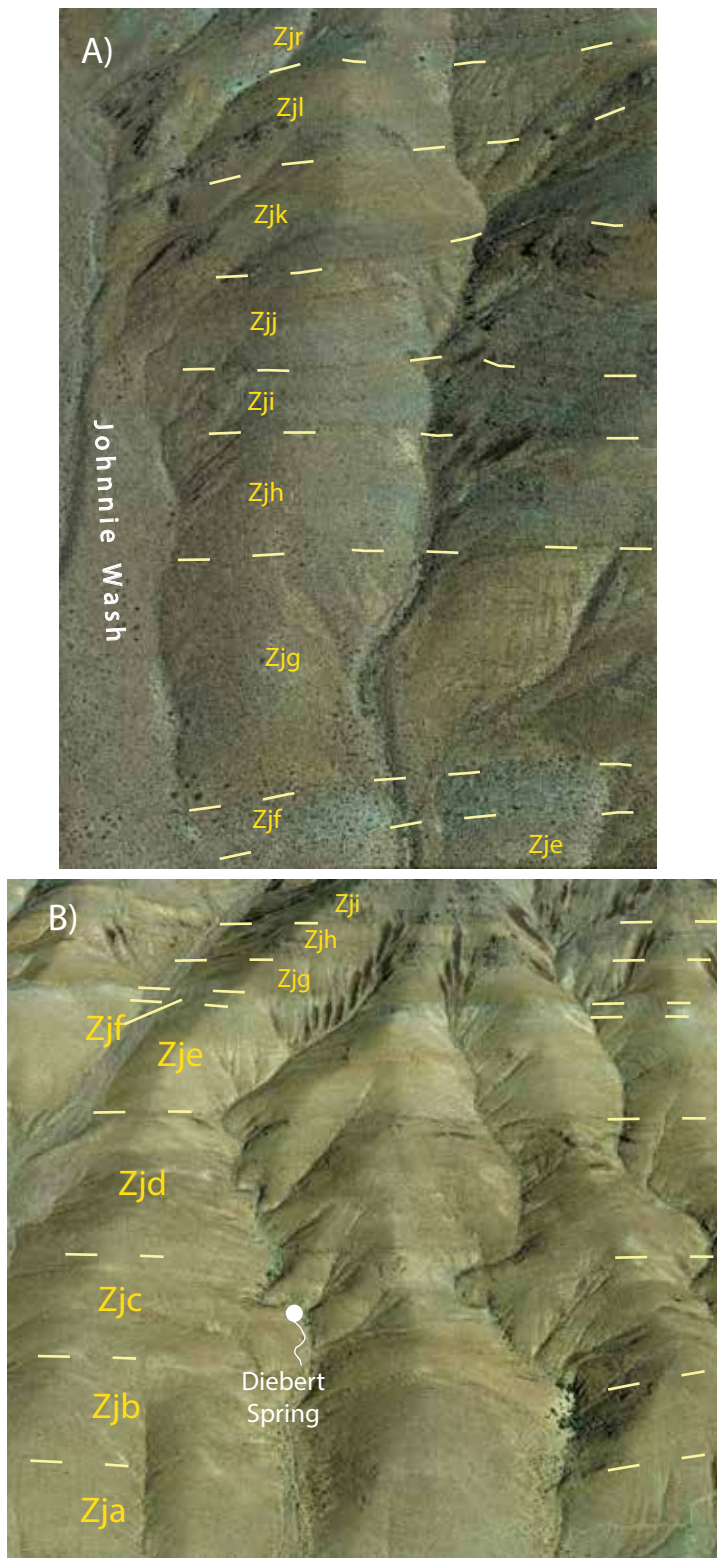

Figure S1: (A) Google Earth image looking c. 60° down-dip to the east along section B - B' in Figure 3, showing traces of mapped unit boundaries (dashed lines) for units E through L and the Rainstorm Member, using unit designations from the Appendix. Width of view at level of Zji is c. 400 m. (B) Google Earth image looking ca. 40° down-dip to the east along section A - A' in Figure 3, showing traces of mapped unit boundaries for units A through I. Width of view at unit D/E boundary is c. 1200 m.

# Zjr (j69-71)

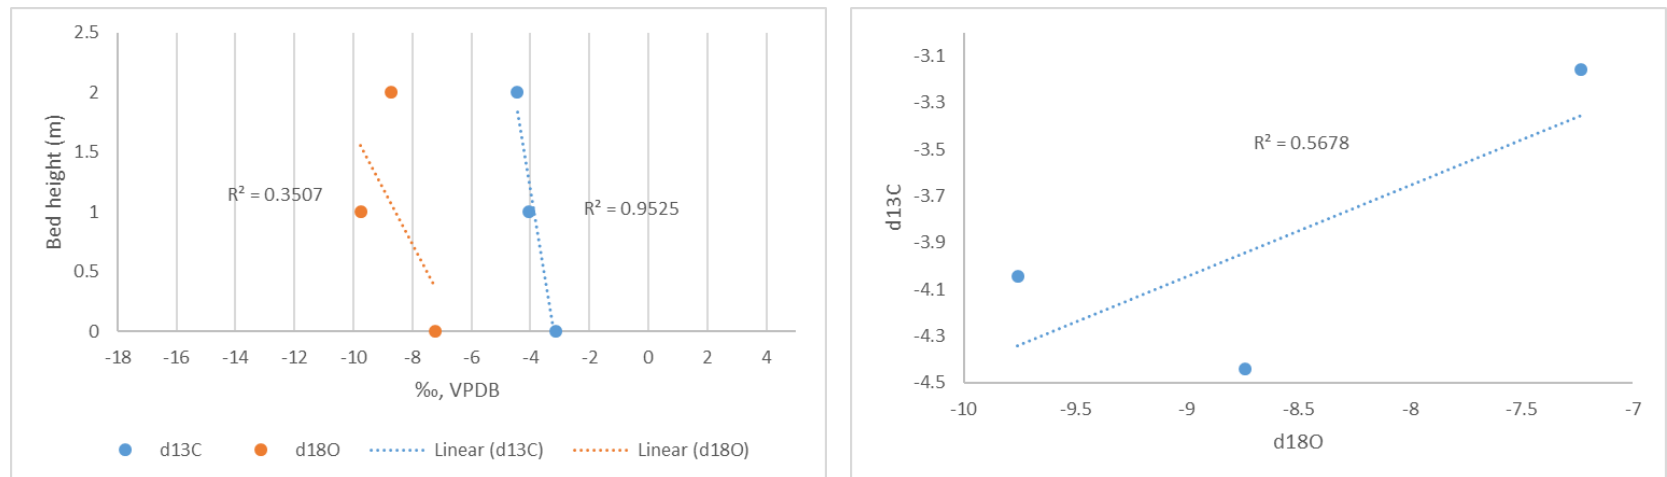

Figure S3: Plots of  $\delta^{13}\text{C}$  and  $\delta^{18}\text{O}$  versus stratigraphic position with side-by-side cross plots of  $\delta^{18}\text{O}$  versus  $\delta^{13}\text{C}$ , for each individual carbonate interval designated in Figure 10 of the main text.

# Zjl (j64-68)

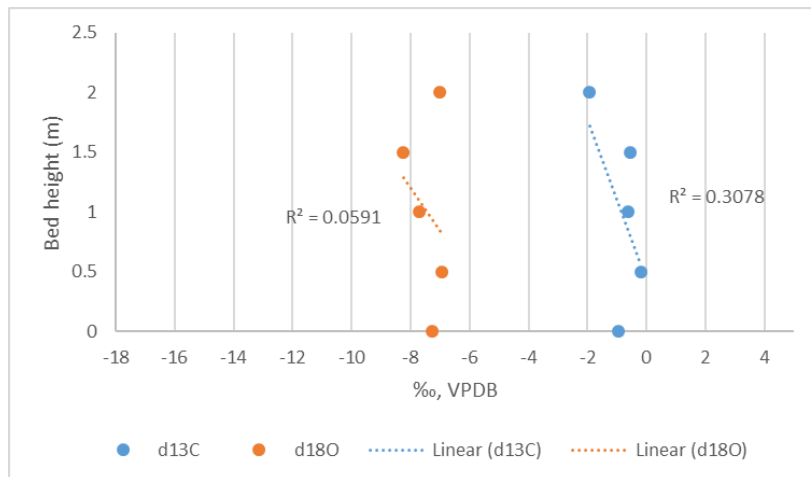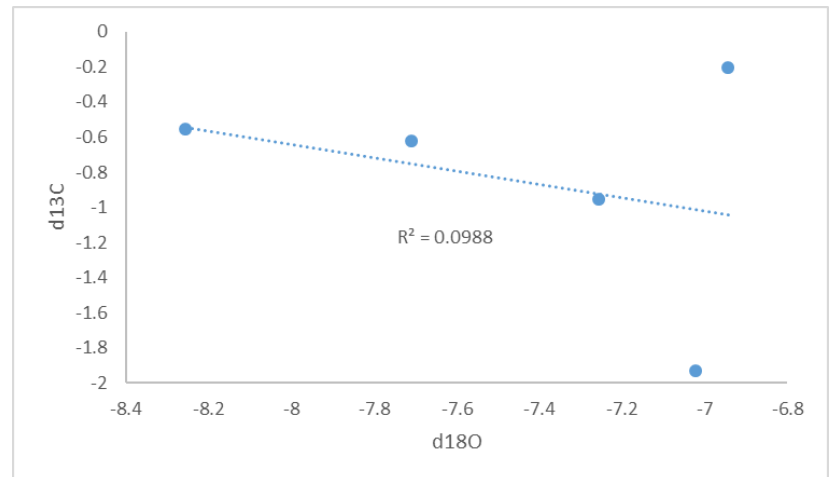

# Zjk2 (j55-63)

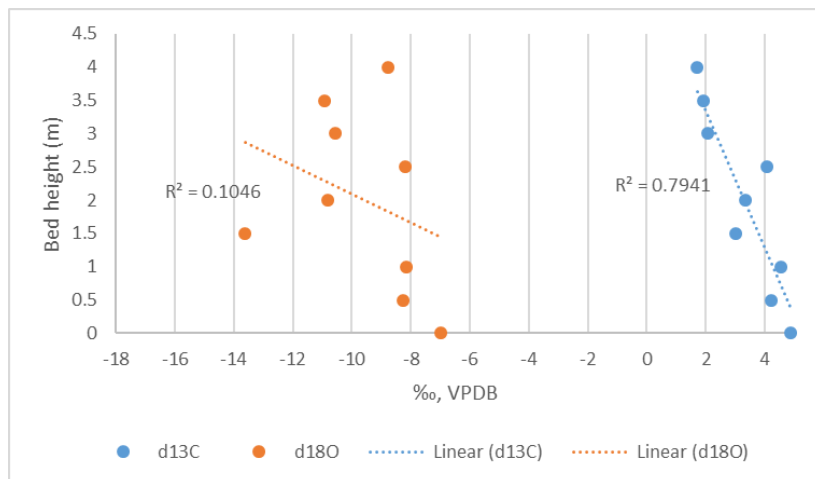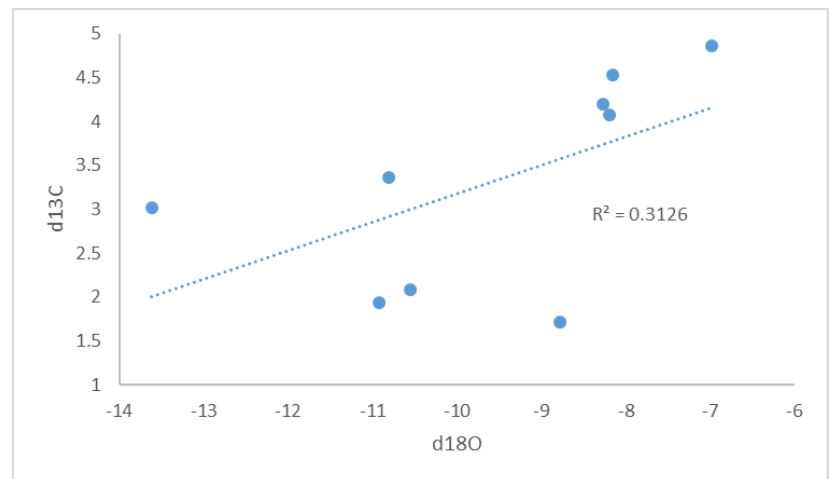

# Zjk1 (j51-54)

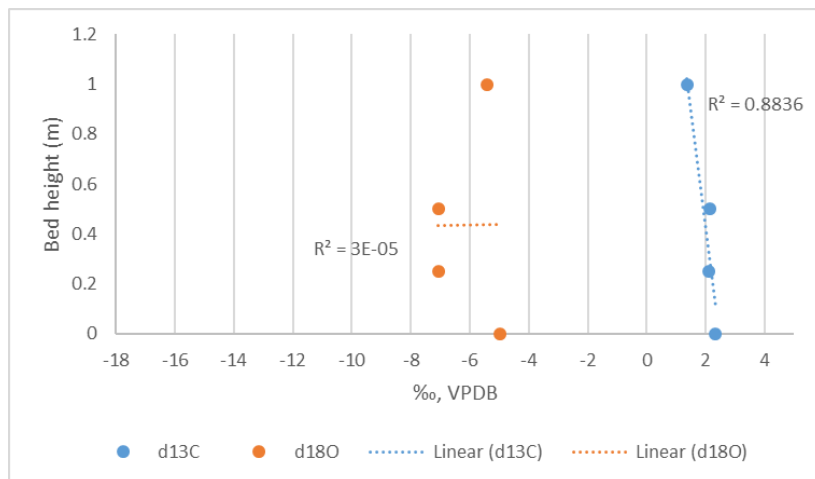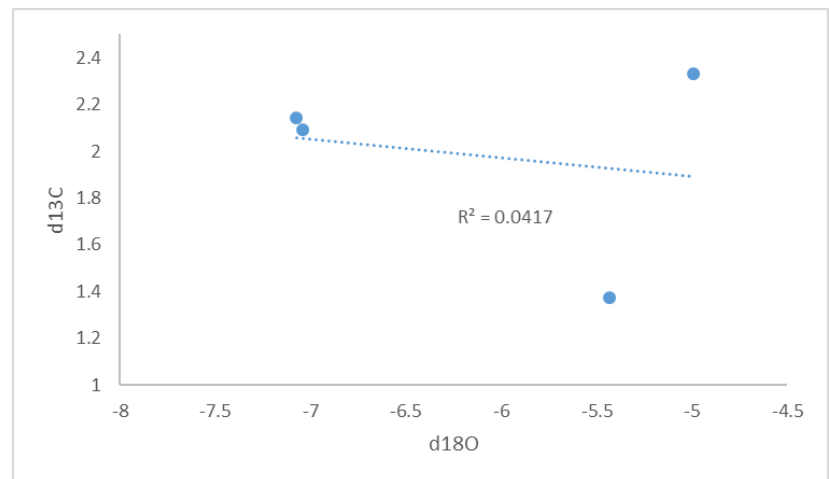

# Zjj2 (j43-50)

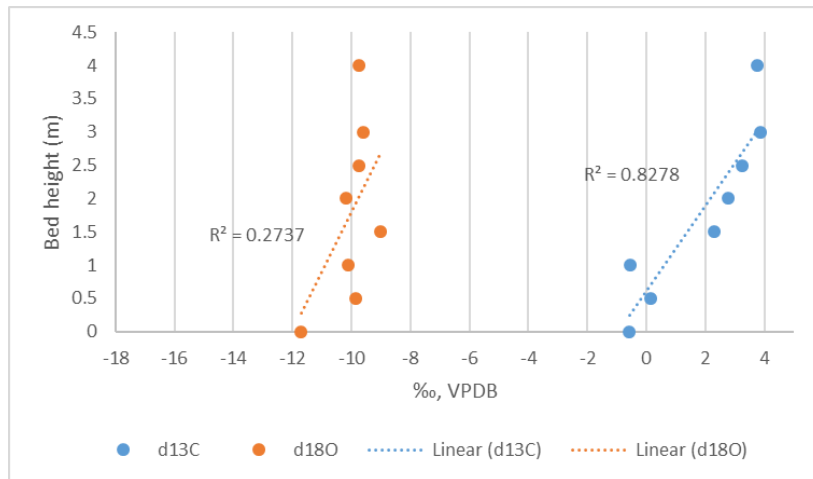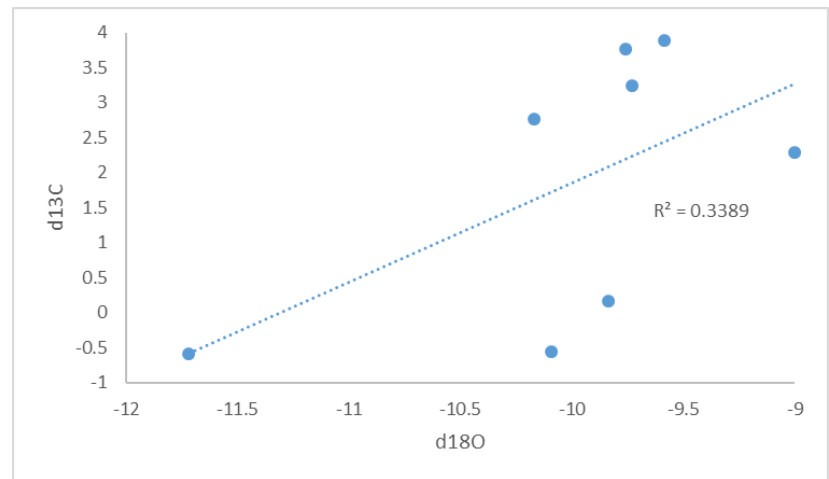

# Zjj1 (j40-42)

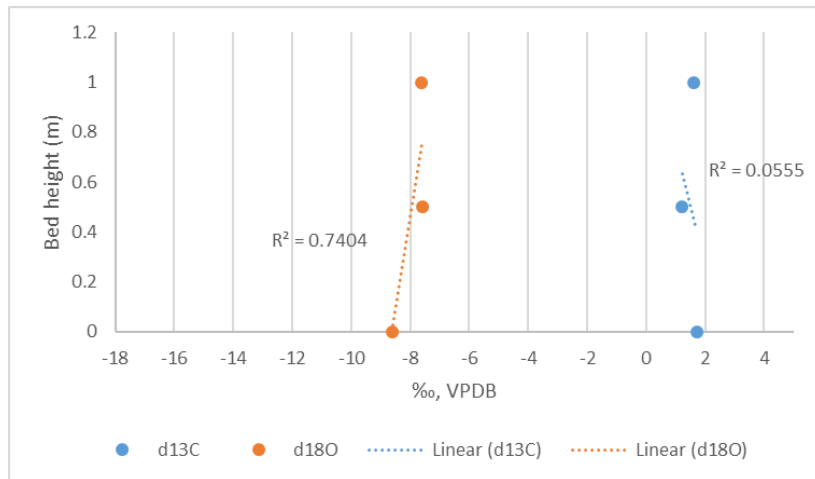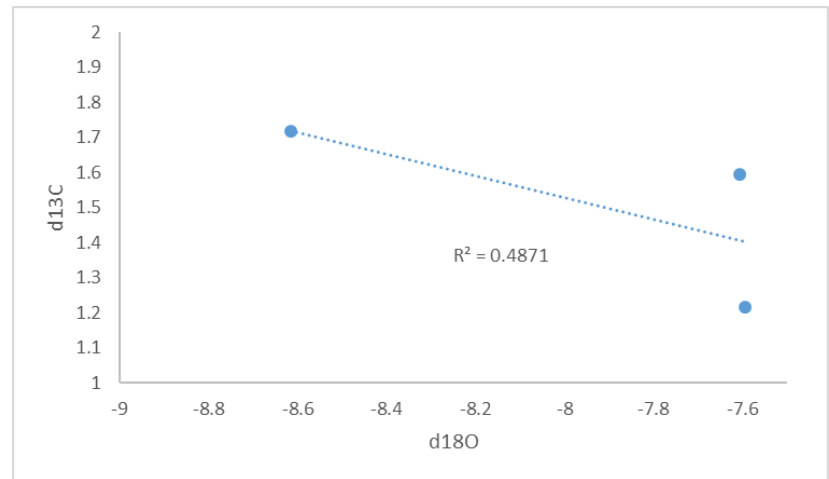



# Zji2 (j34-39)

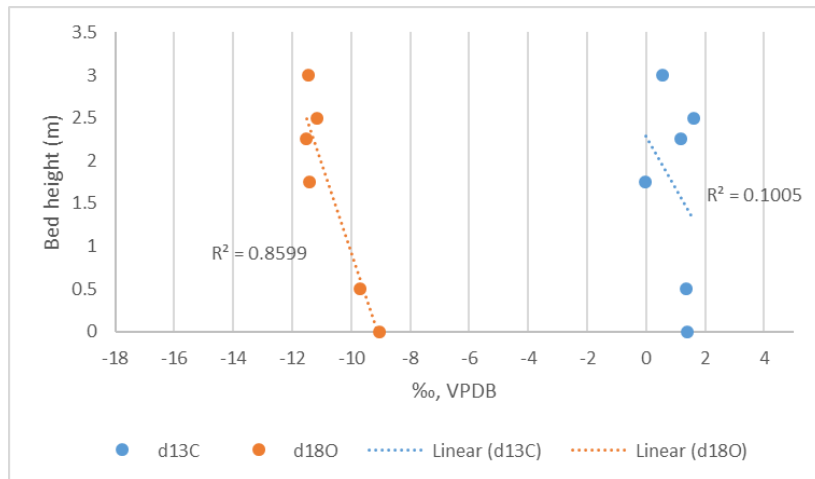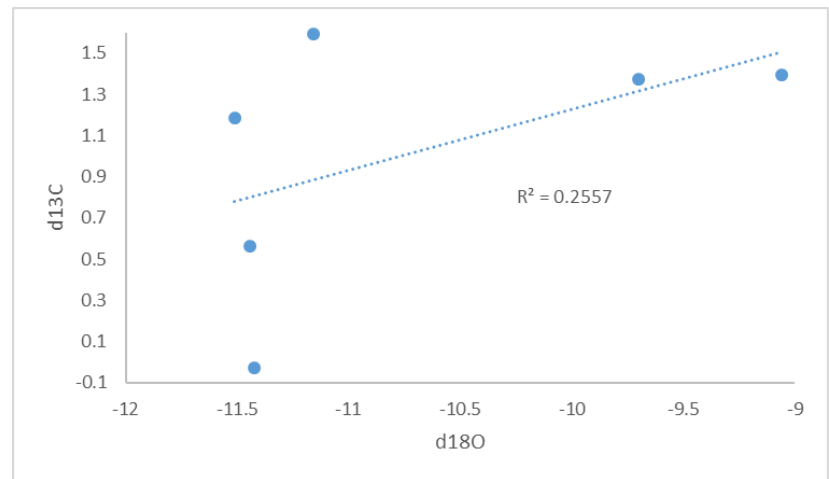

# Zji1 (j33)

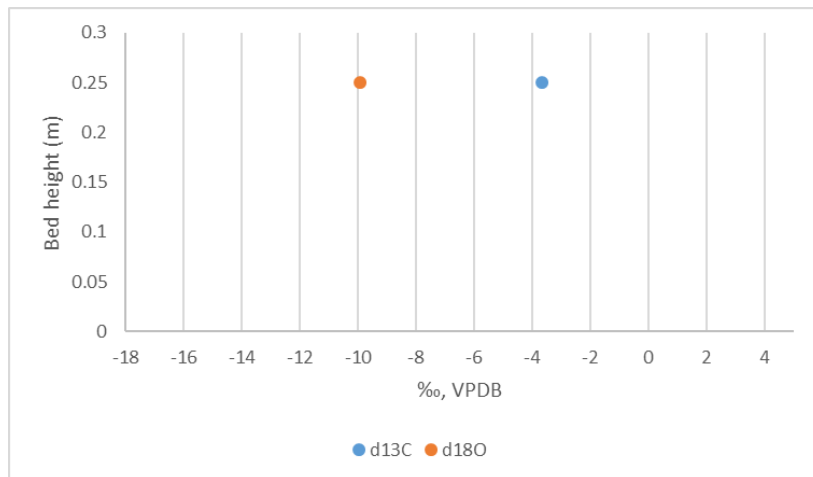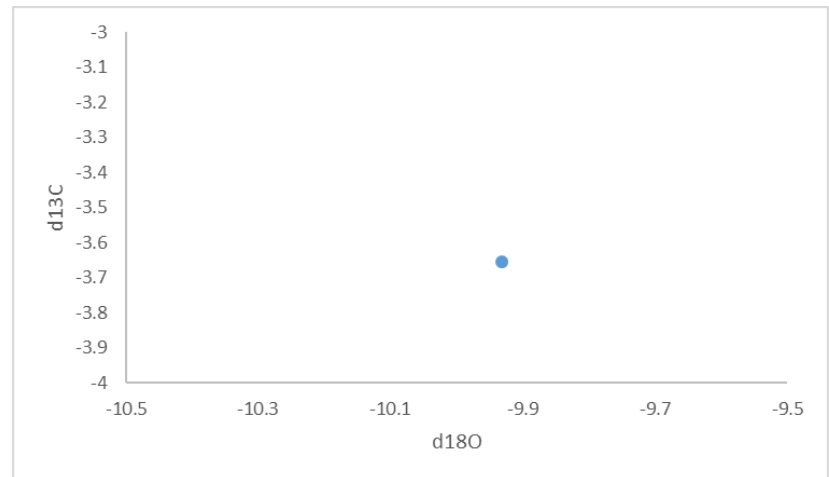

# Zjh6 (j23-32)

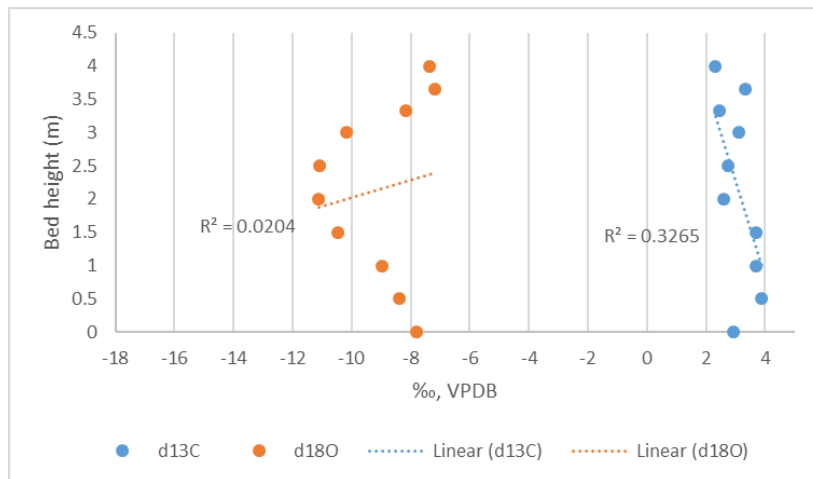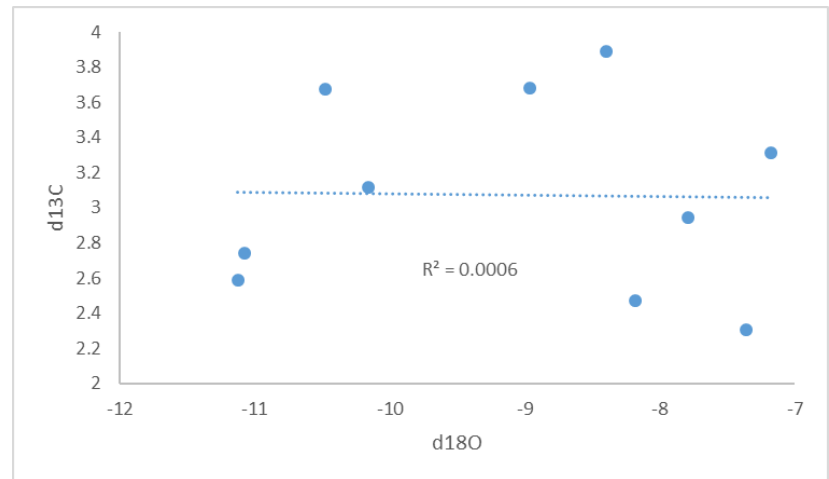

# Zjh5 (j21-22)

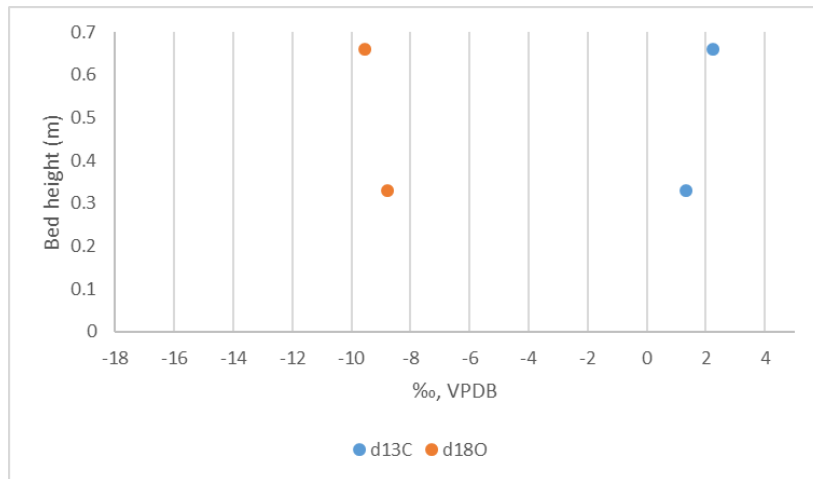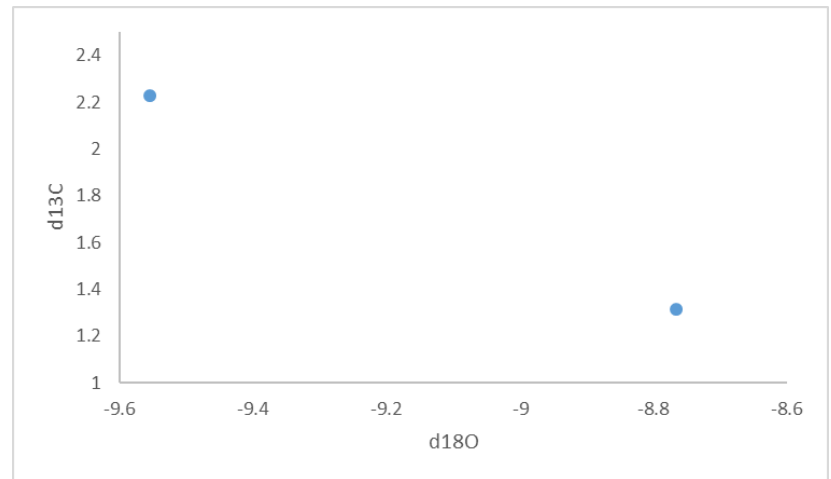

# Zjh4 (j20)

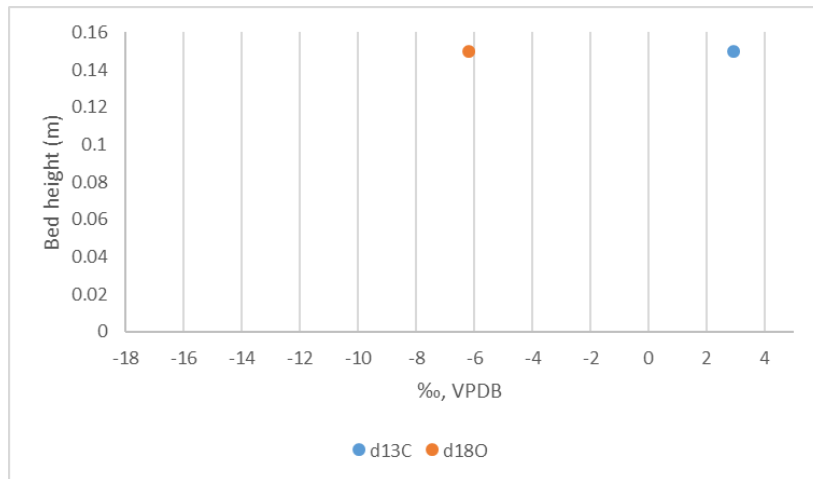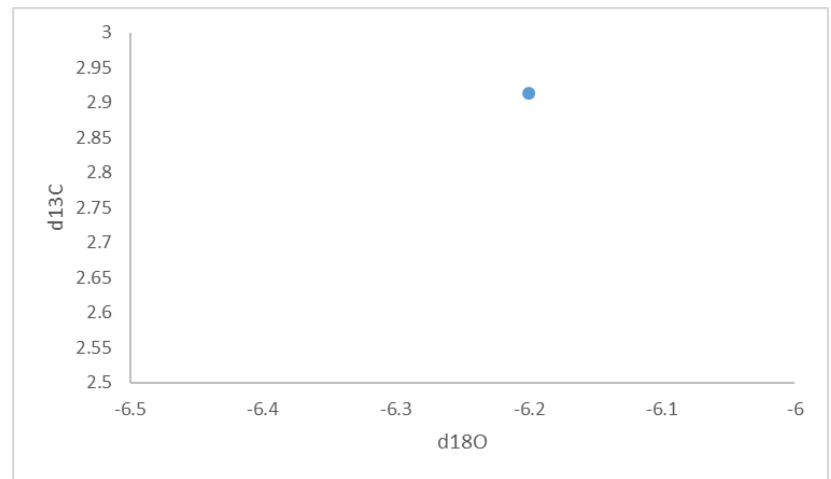

# Zjh3 (j19)

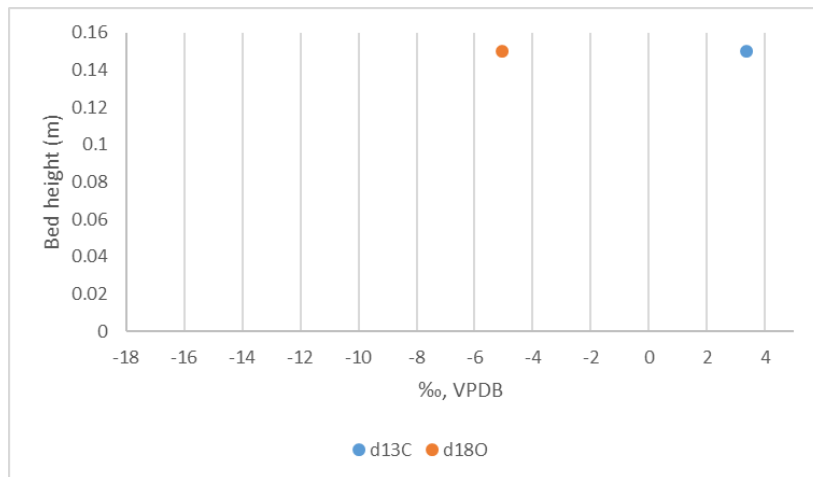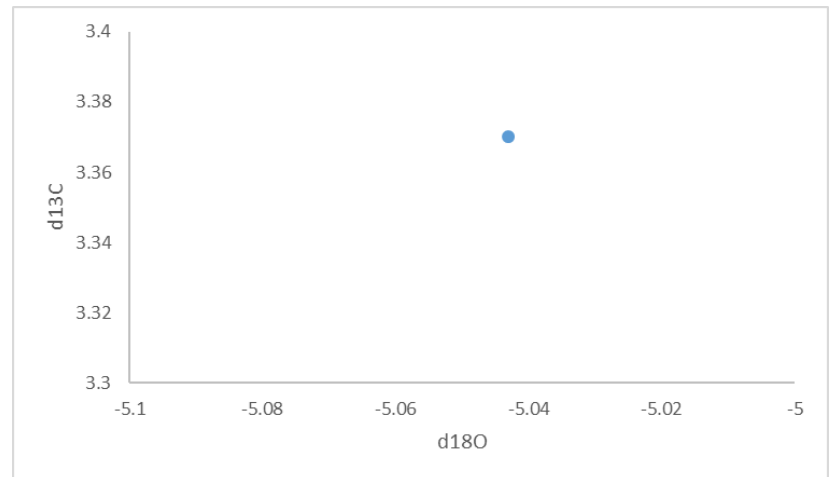

# Zjh2 (j5-18)

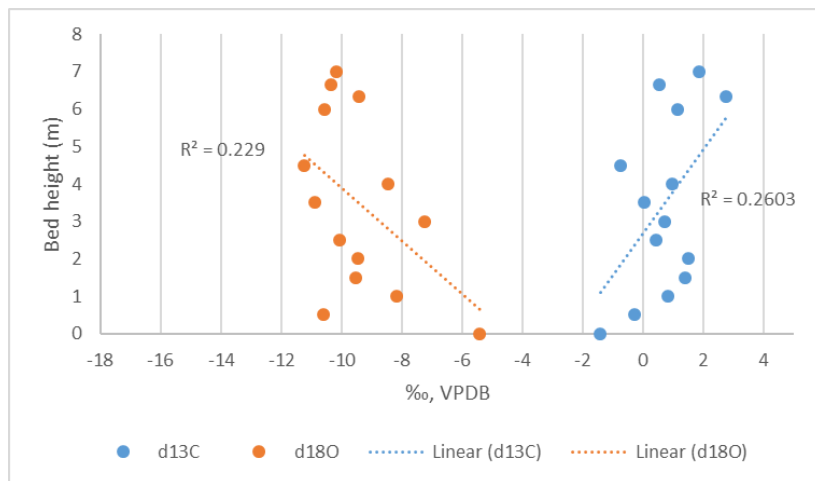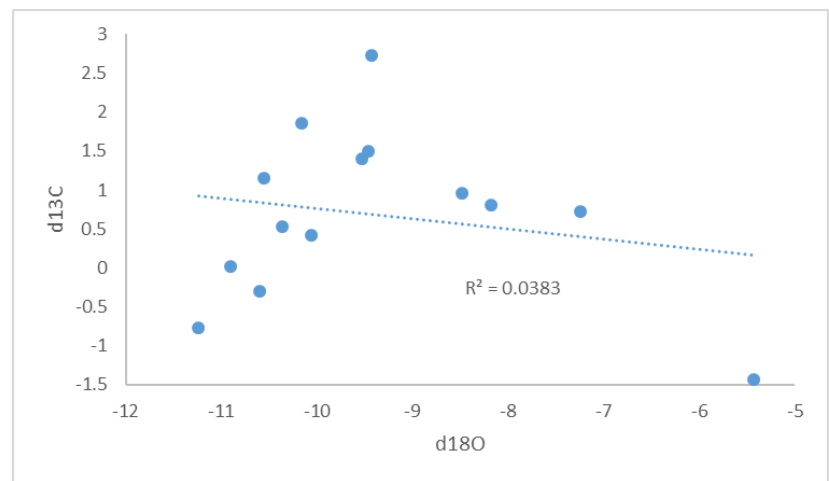

# Zjh1 (j(1-4)

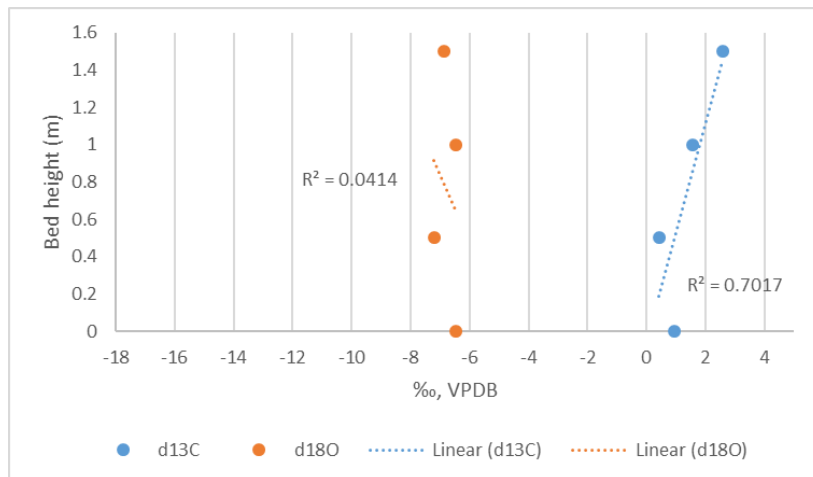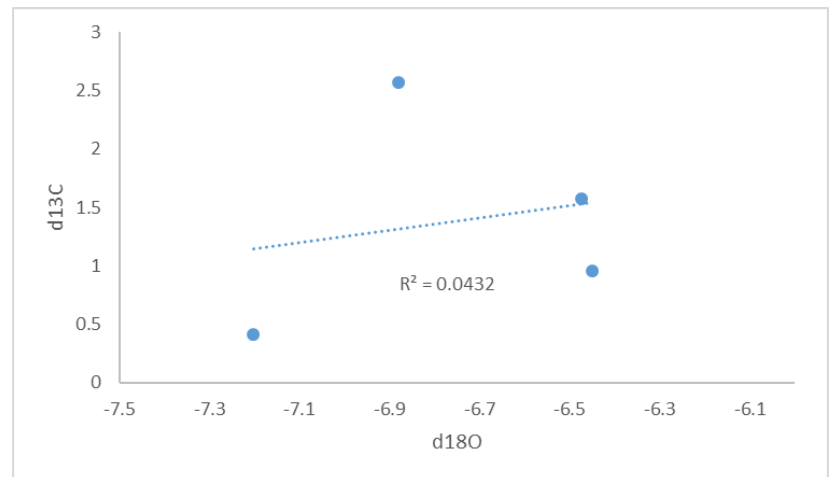



# Zjf (j76-107)

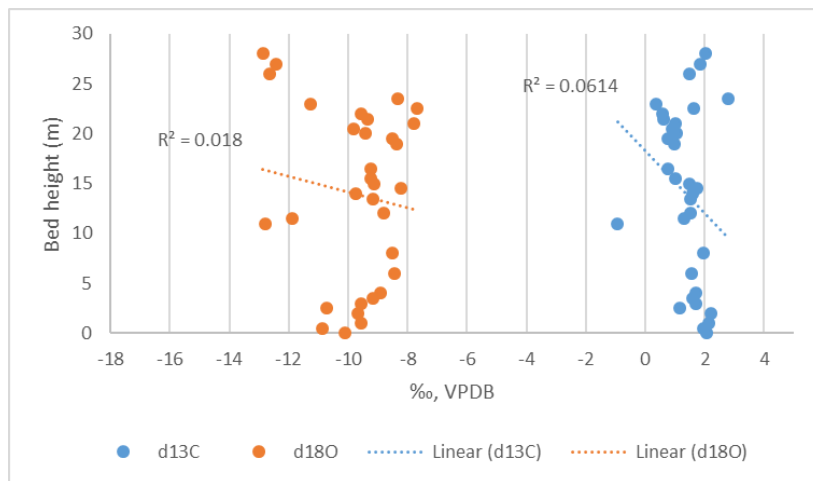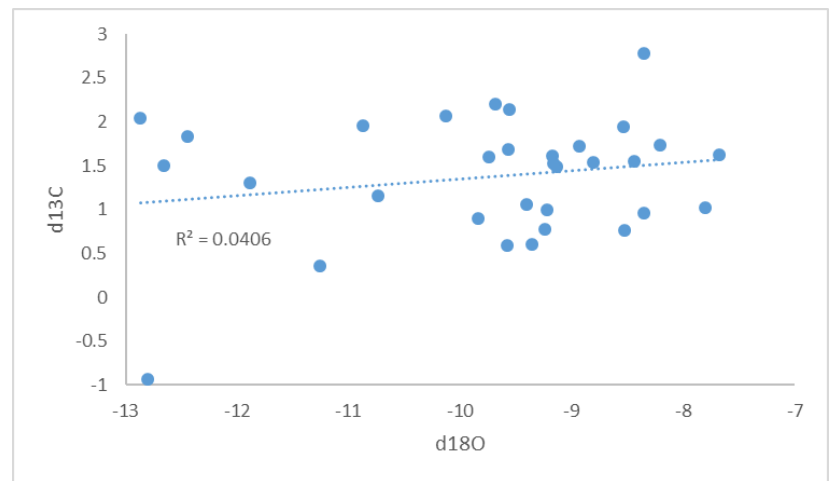

# Zjc (j72-75)

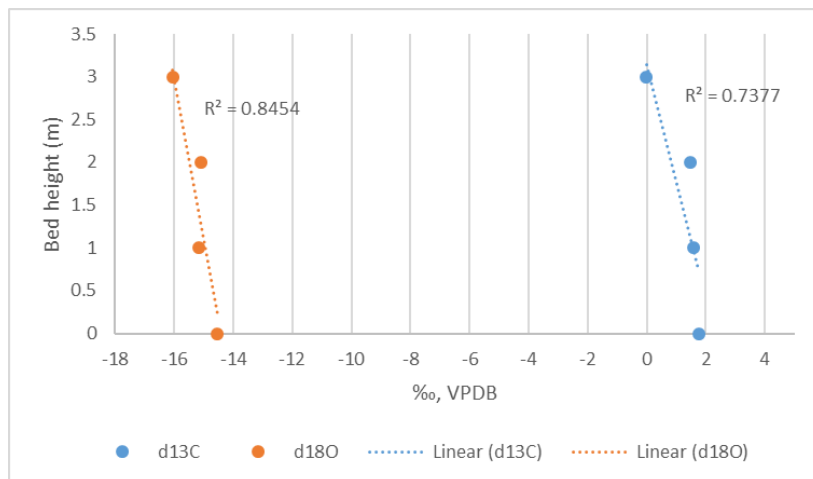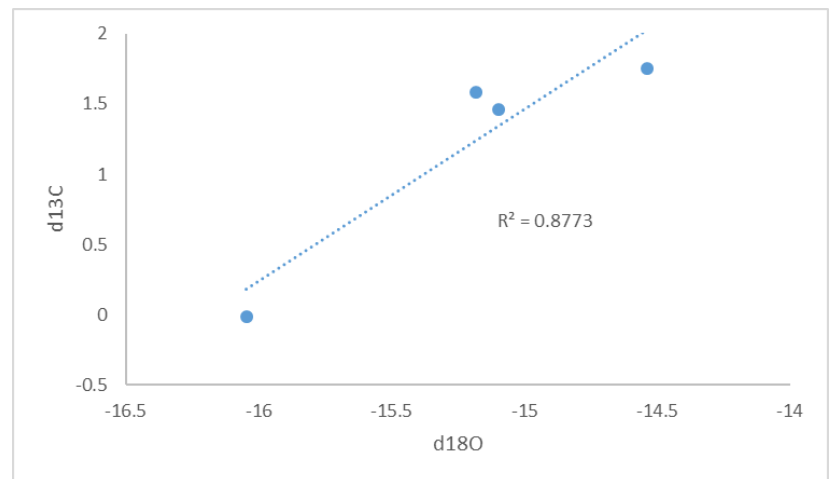

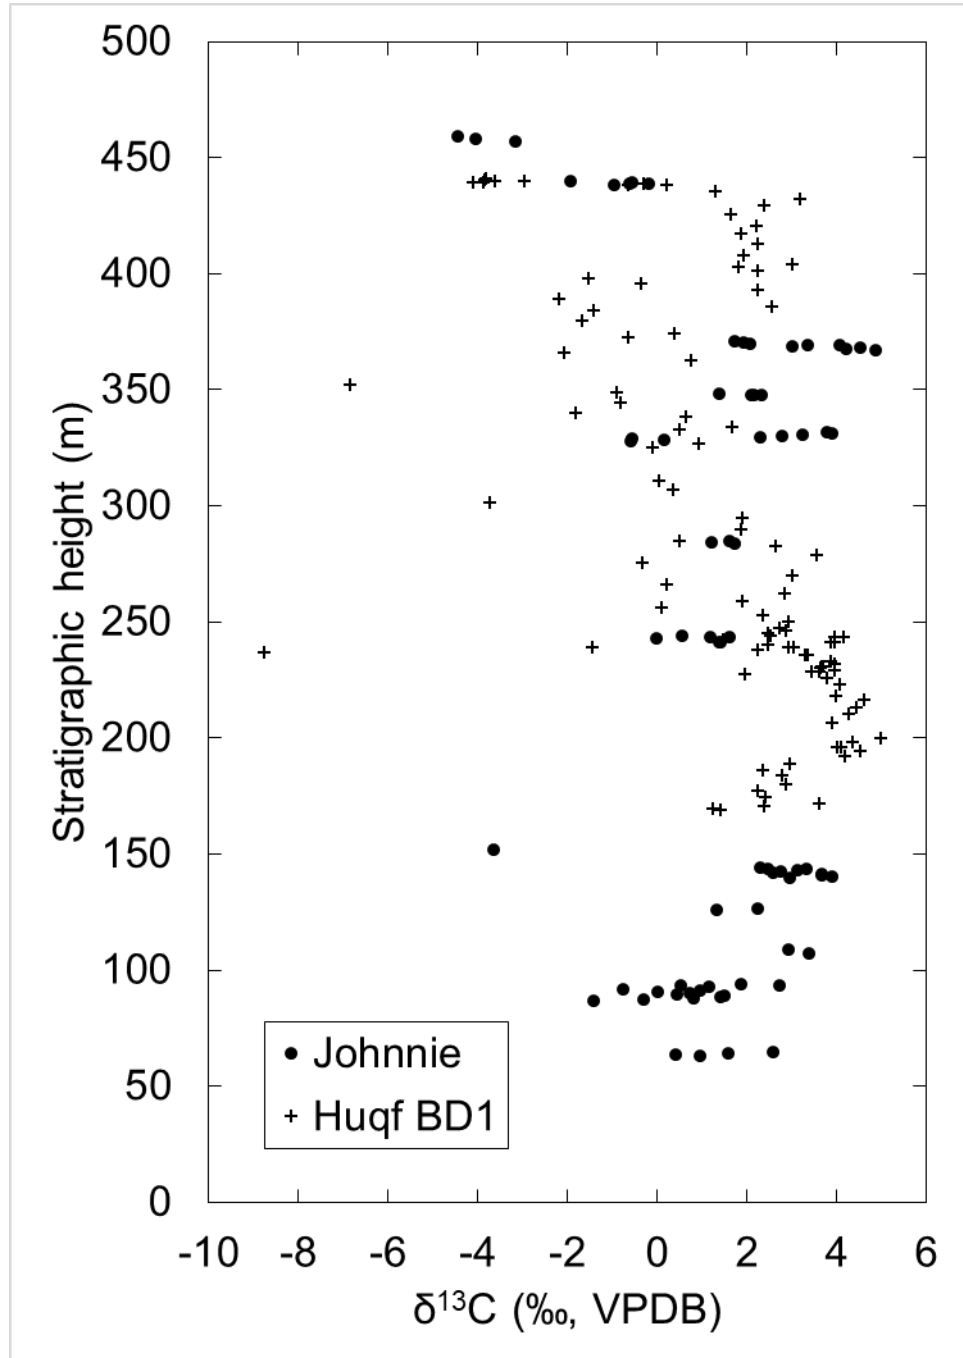

Figure S3: Chemostratigraphic profiles comparing carbon isotopic data from the Johnnie Formation from unit H through the lowermost Rainstorm Member (ending at the top of the oolite marker bed, Figure 7) with profiles from the Buah Dome (BD1, BD4, BD5, BD6); Khufai Dome (KDW); and Mukhaibah Dome (MD5, MD6, MDE) areas of Oman (Osburn et al., 2015). Vertical axis shows measured stratigraphic height, from the Mt. Schader section, in all profiles.

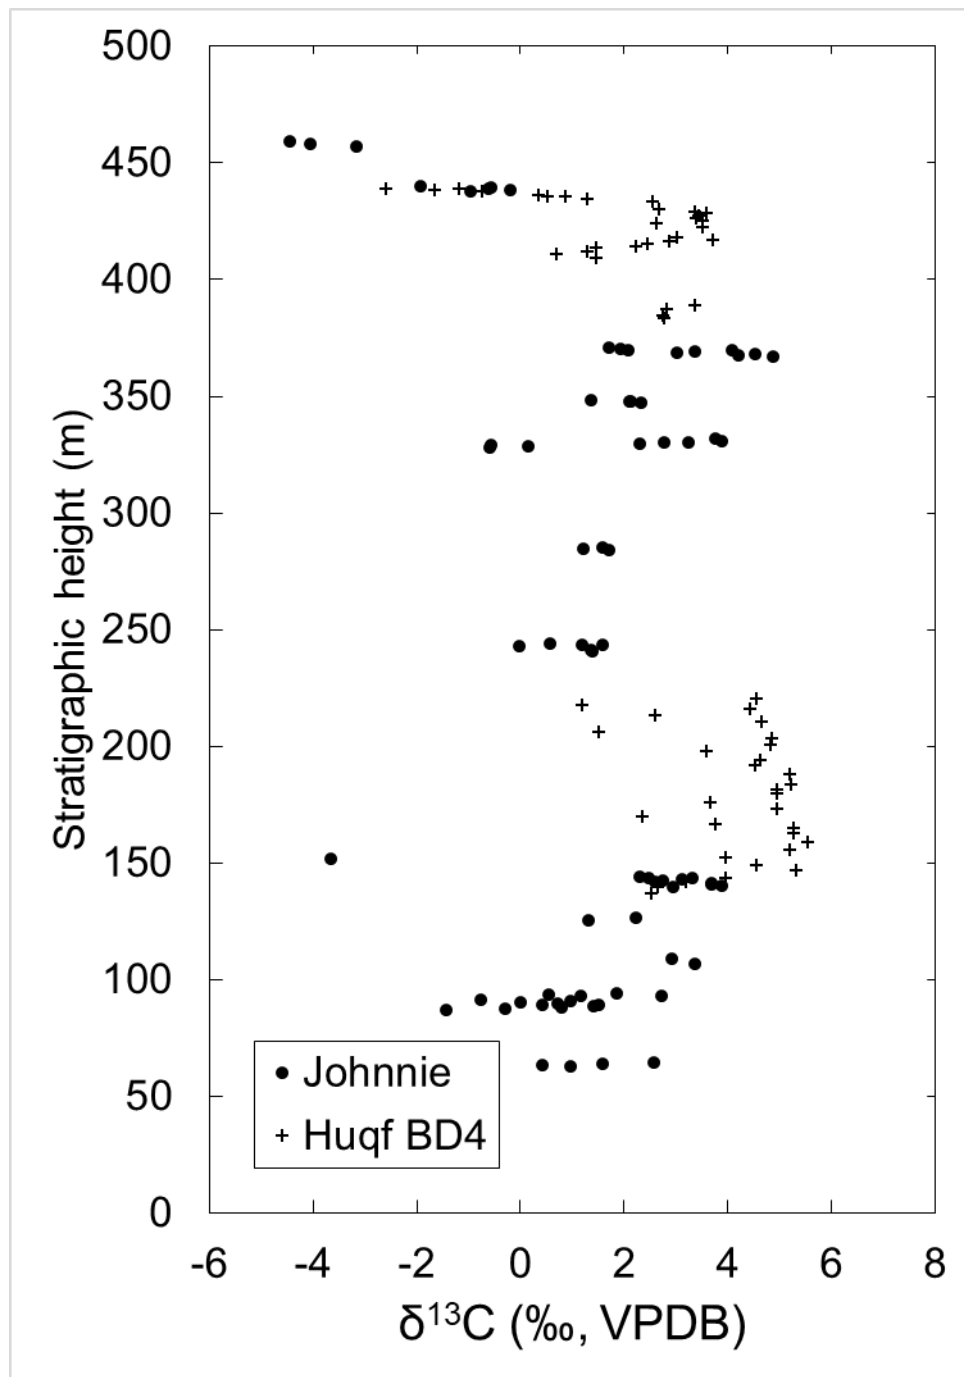

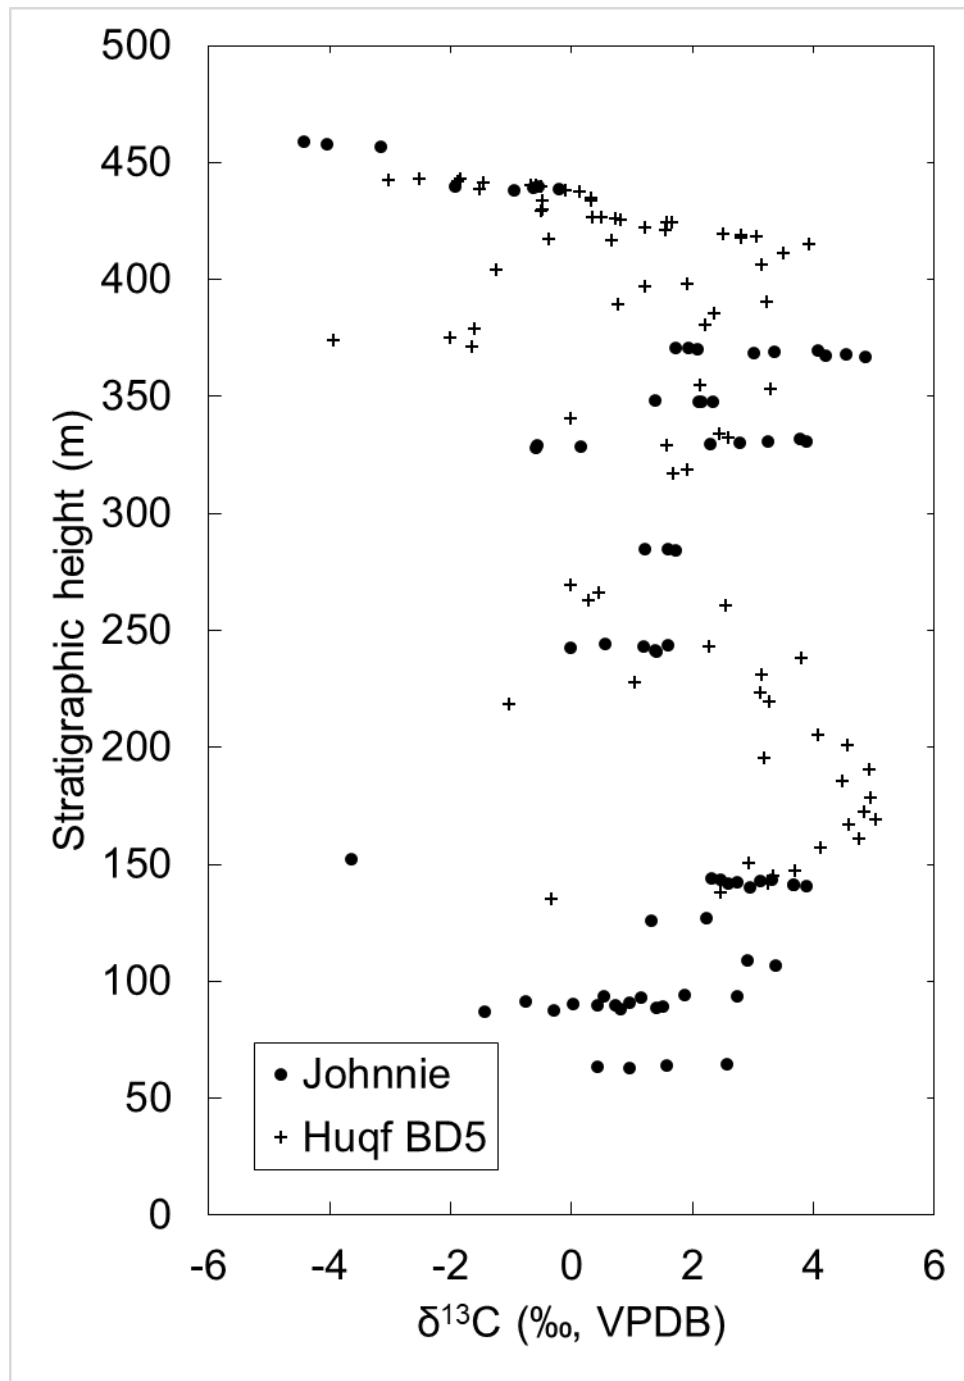

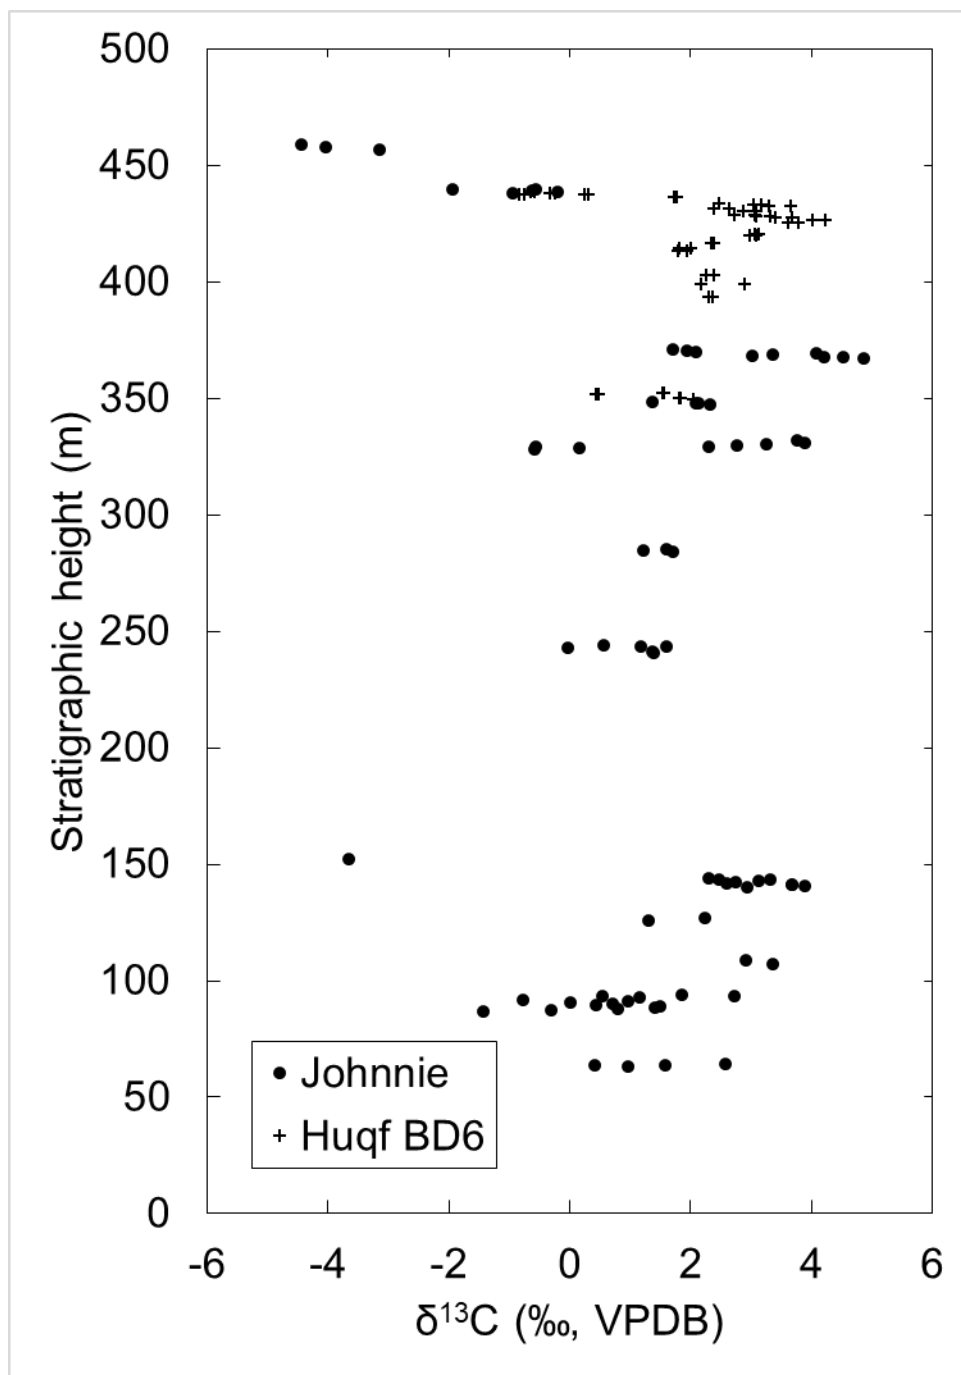

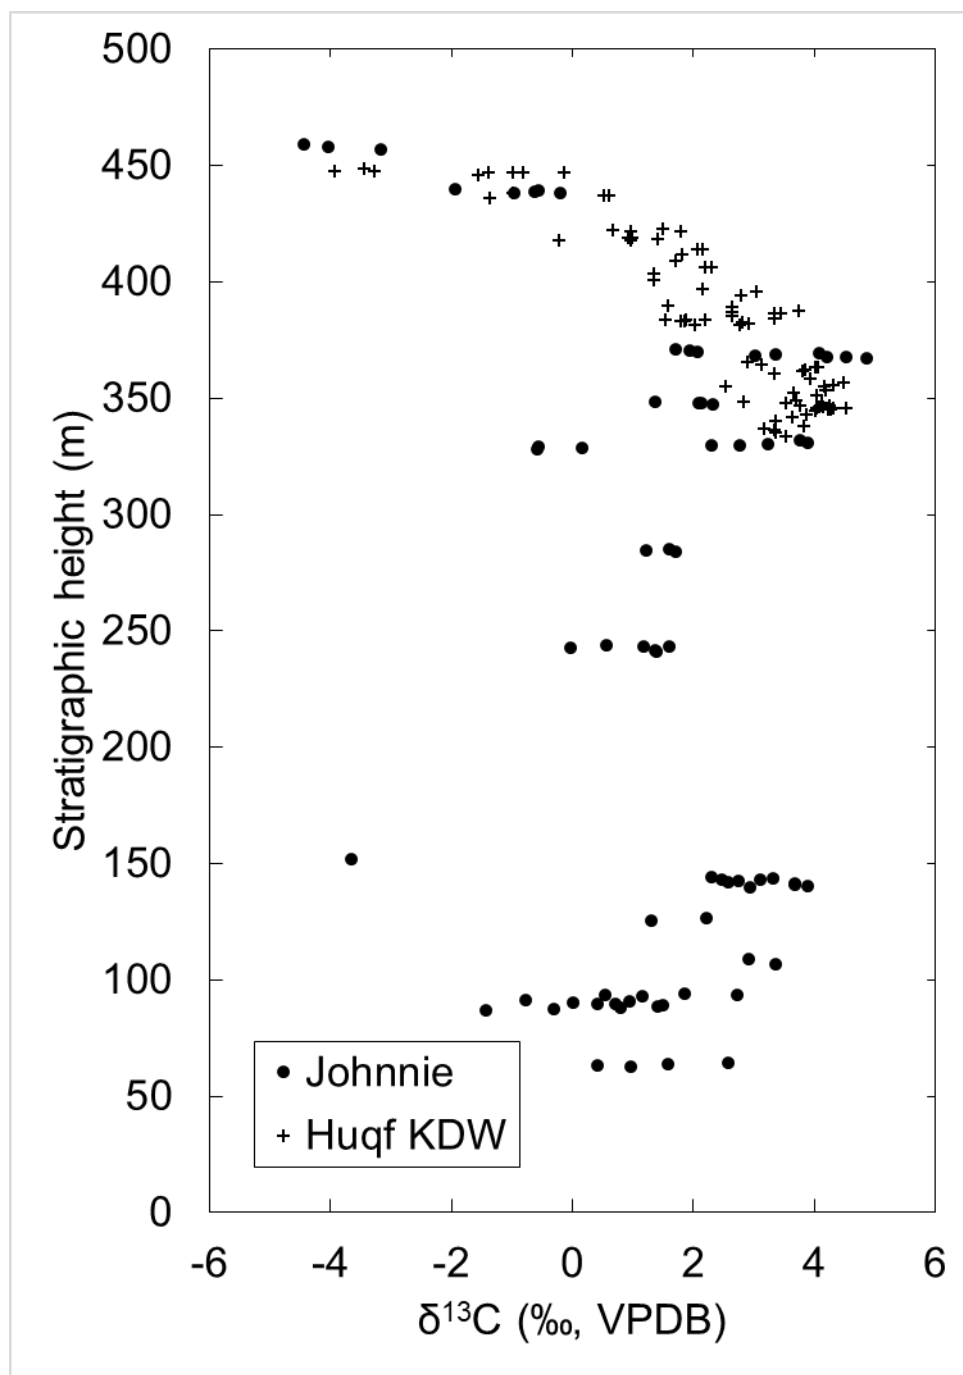

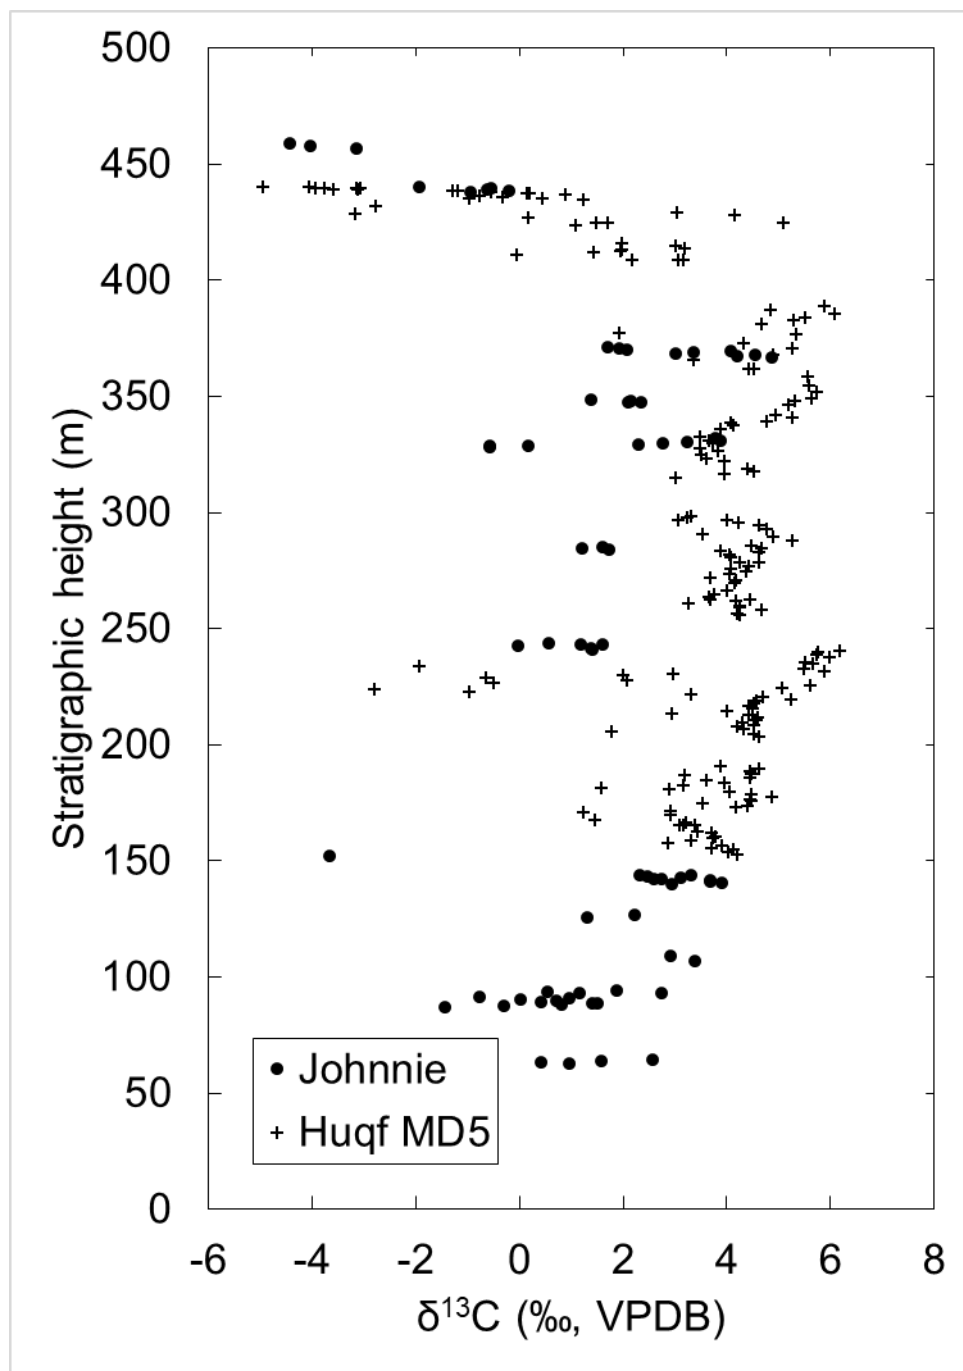



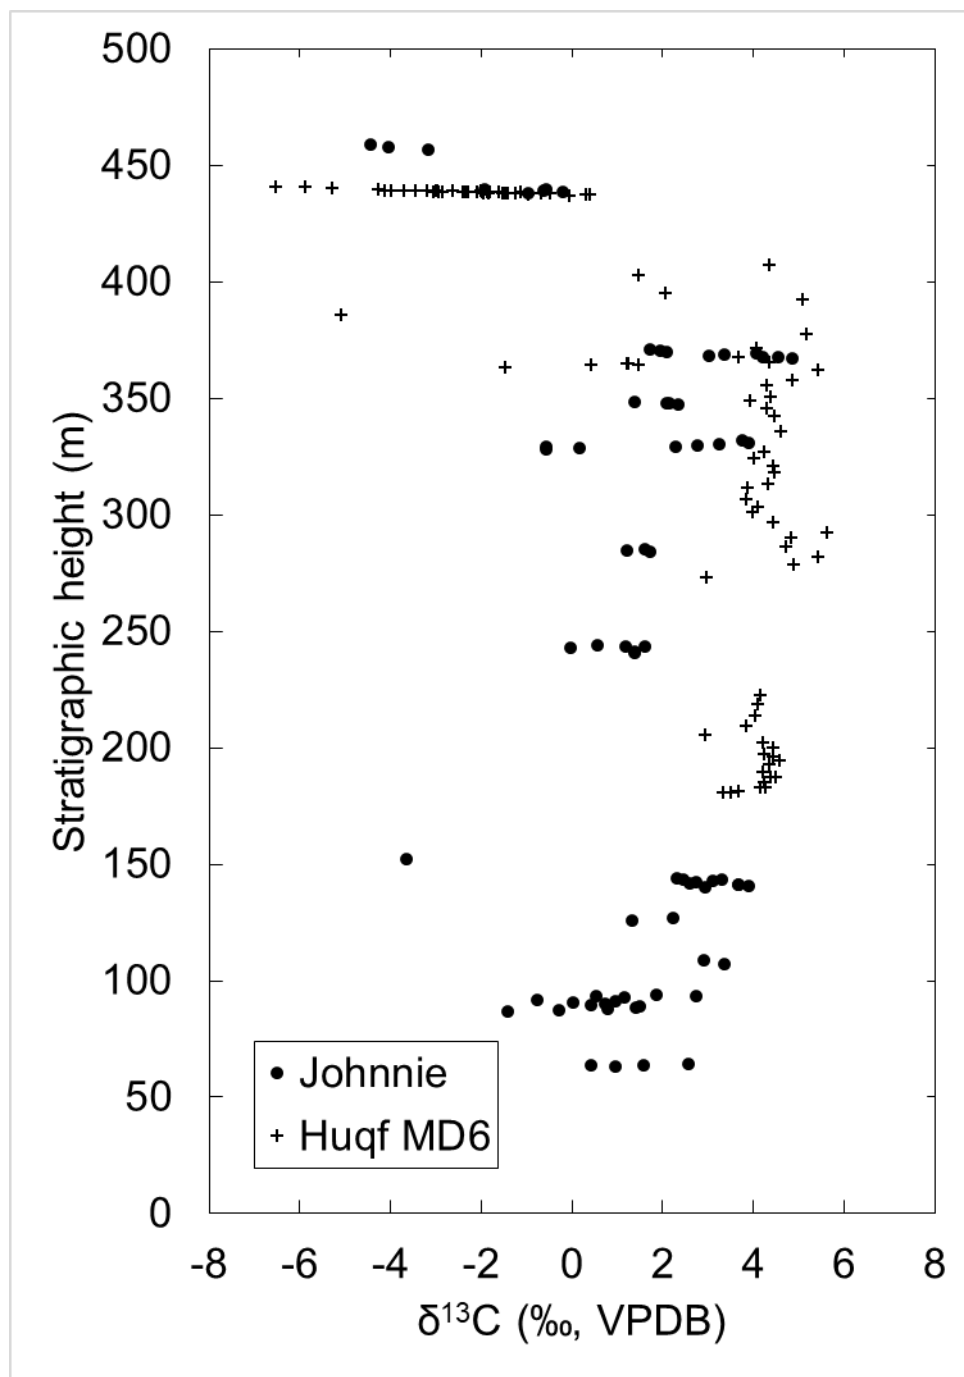

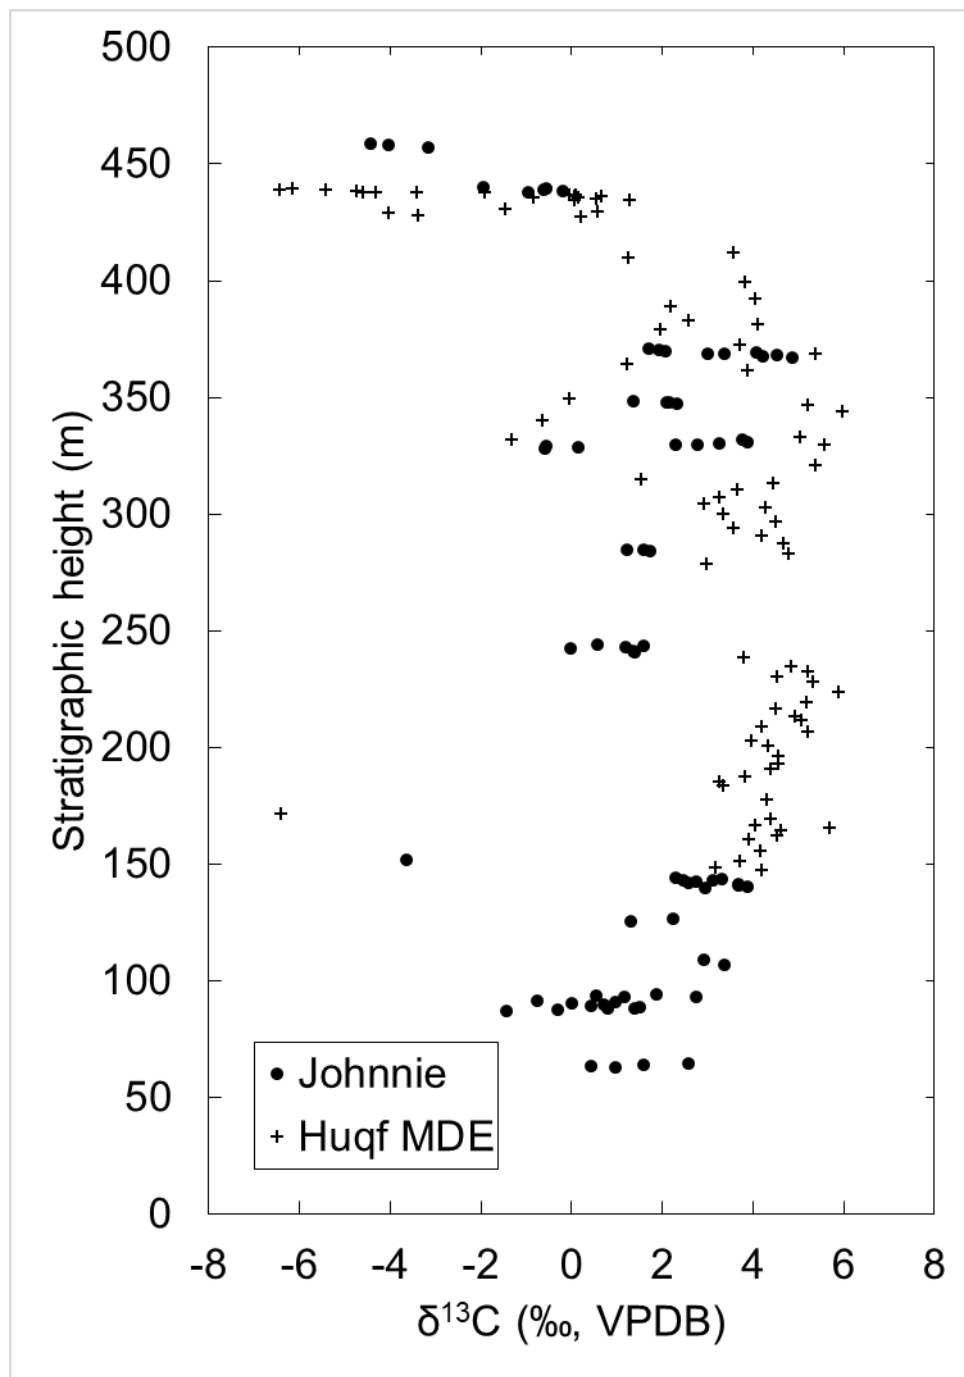

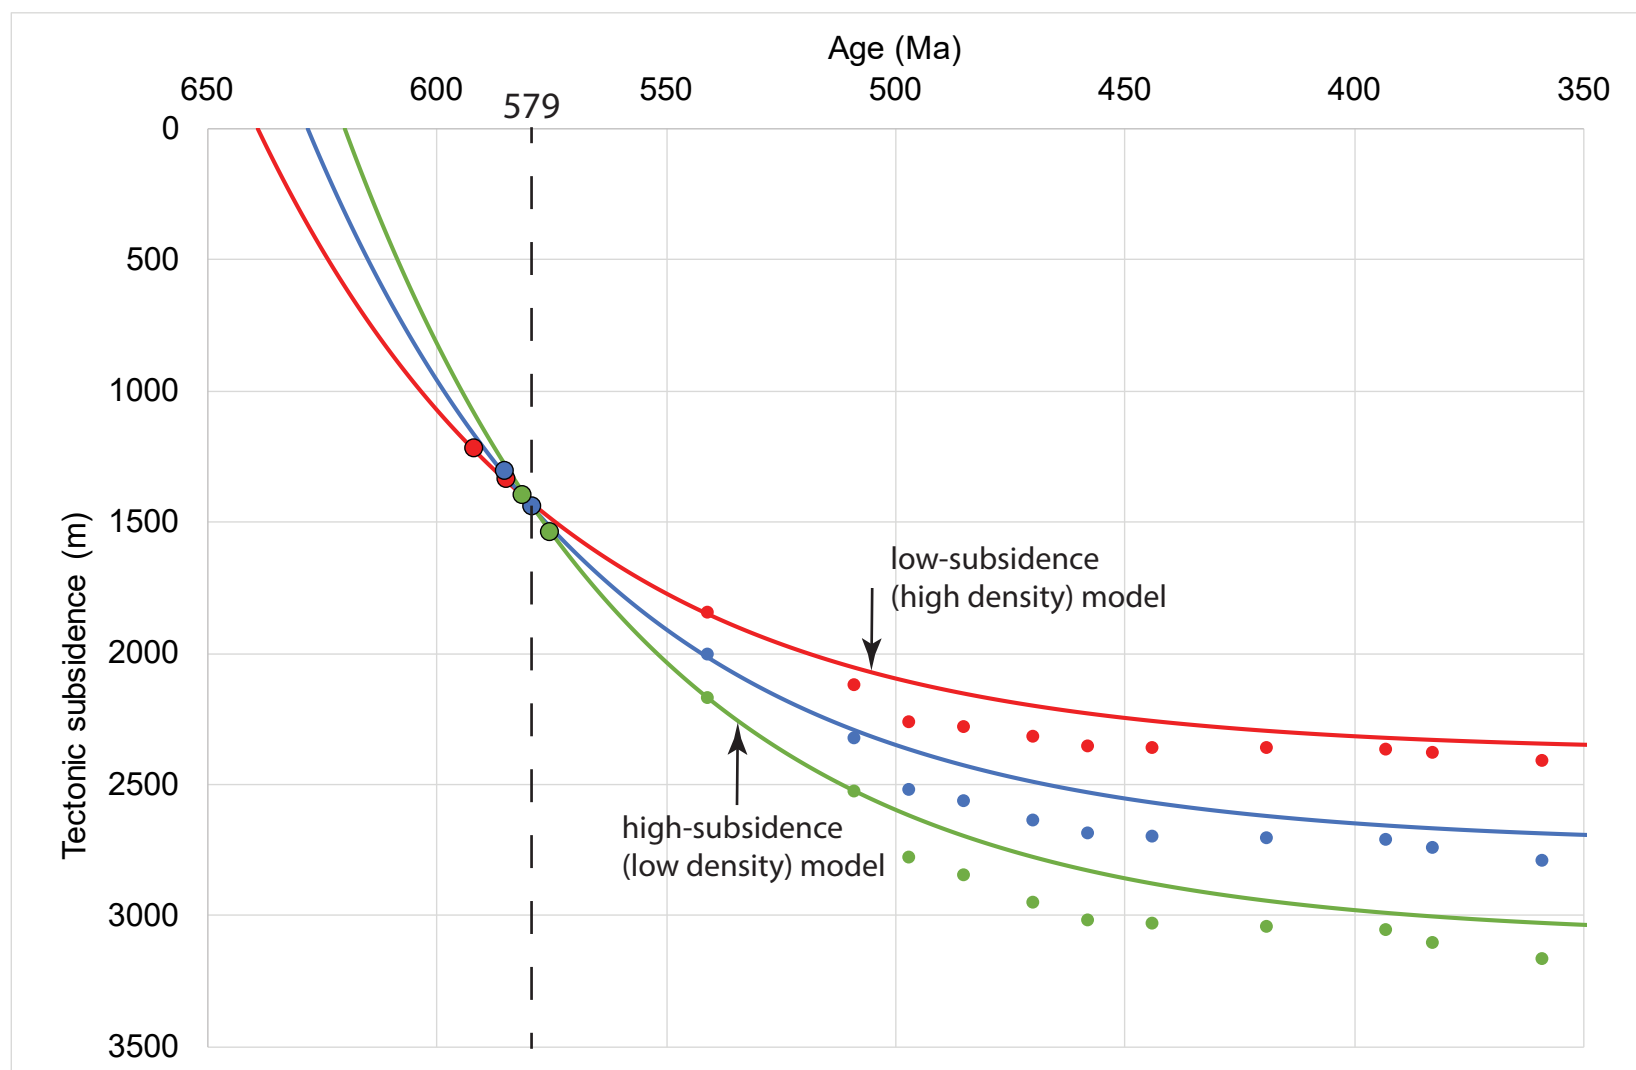

Figure S4: Plot showing tectonic subsidence data and models as a function of age (small points and curves, respectively), showing the effect of varying sediment grain density on estimates for the age and duration of the Shuram excursion (large points). Red: high-density; blue: intermediate density; green: low density.

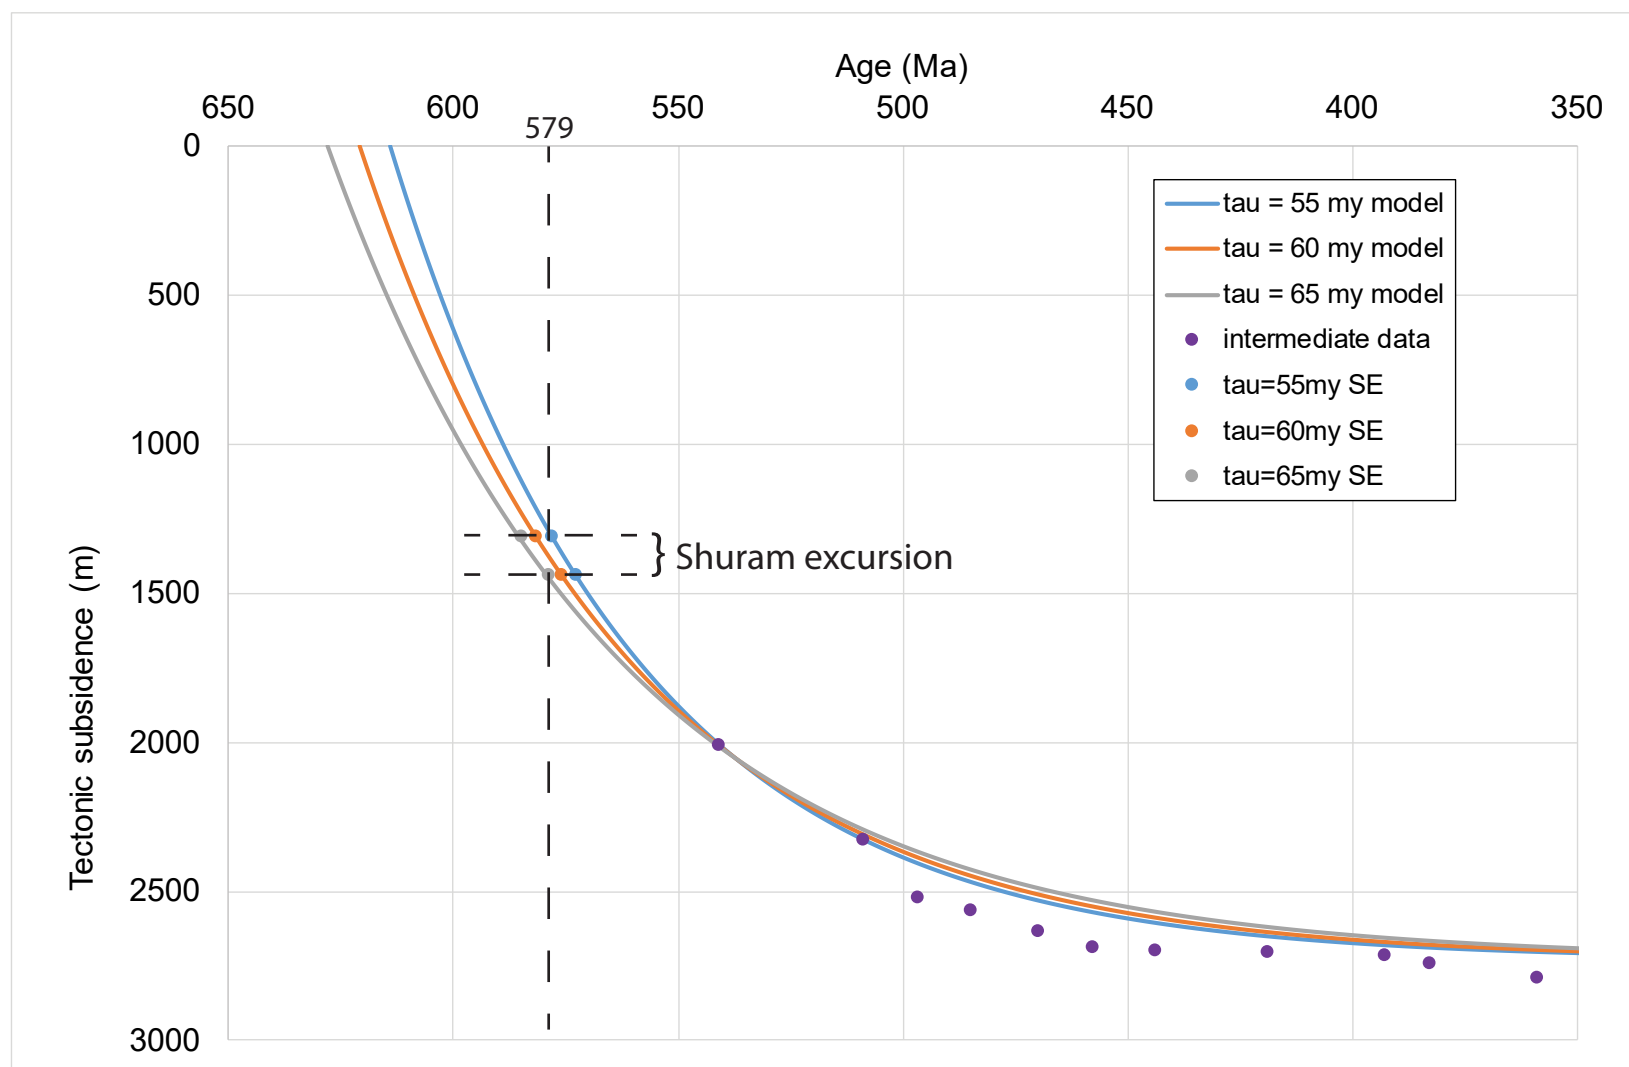

Figure S5: Plot showing tectonic subsidence data and models as a function of age (points and curves, respectively), showing the effect of varying the exponential time constant  $\tau$ . Models are fit to the 541 Ma data point and assume intermediate sediment grain density.

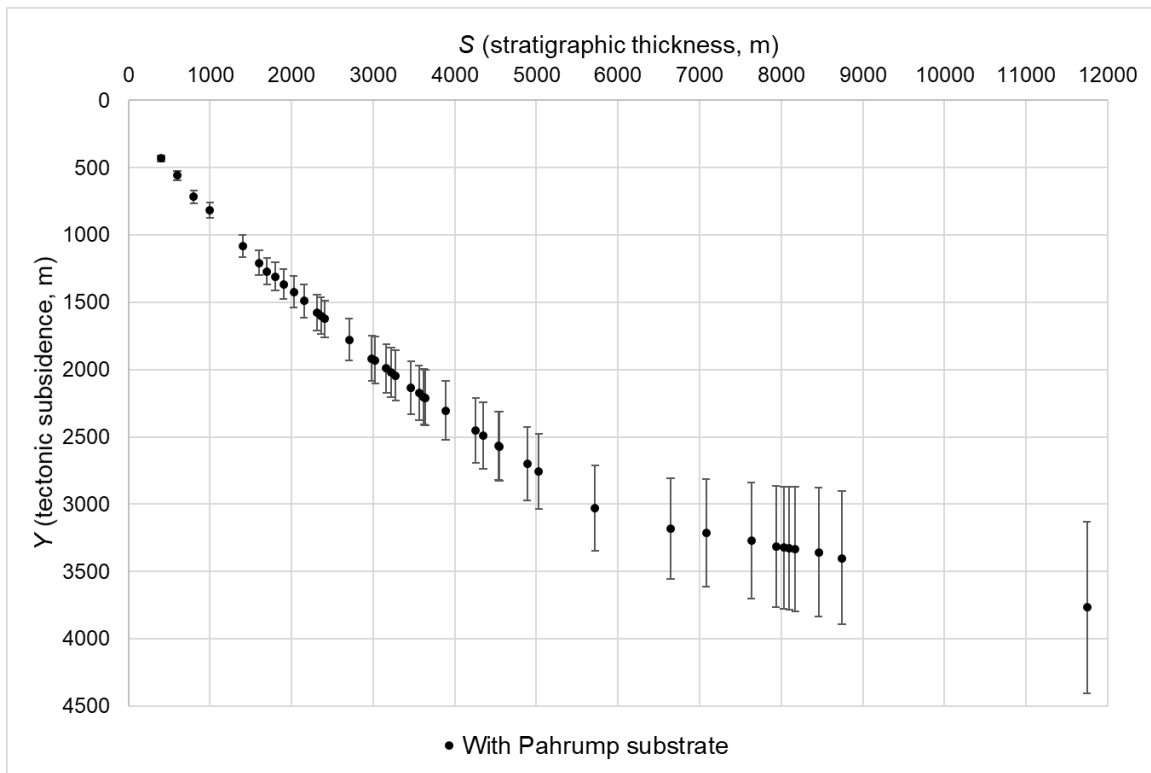

Figure S6: Plot showing calculated tectonic subsidence  $Y$  as a function of observed stratigraphic thickness  $S$  for the backstripping and delithification model that includes a hypothetical Pahrump Group substrate below the lowest exposed Johnnie Formation strata (unit A) in the Spring Mountains section. Error bars show range of estimates of  $Y$  produced by a  $\pm 5\%$  variation in sediment grain density.

## FIGURE CAPTIONS

Figure S1: (A) Google Earth image looking c. 60° down-dip to the east along section B - B' in Figure 3, showing traces of mapped unit boundaries (dashed lines) for units E through L and the Rainstorm Member, using unit designations from the Appendix. Width of view at level of Zji is c. 400 m. (B) Google Earth image looking c. 40° down-dip to the east along section A - A' in Figure 3, showing traces of mapped unit boundaries for units A through I. Width of view at unit D/E boundary is c. 1200 m.

Figure S2: Plots of  $\delta^{13}\text{C}$  and  $\delta^{18}\text{O}$  versus stratigraphic position with side-by-side cross plots of  $\delta^{18}\text{O}$  versus  $\delta^{13}\text{C}$ , for each individual carbonate interval designated in Figure 10 of the main text.

Figure S3: Chemostratigraphic profiles comparing carbon isotopic data from the Johnnie Formation from unit H through the lowermost Rainstorm Member (ending at the top of the oolite marker bed, Figure 7) with profiles from the Buah Dome (BD1, BD4, BD5, BD6); Khufai Dome (KDW); and Mukhaibah Dome (MD5, MD6, MDE) areas of Oman (Osburn et al., 2015). Vertical axis shows measured stratigraphic height, from the Mt. Schader section, in all profiles.

Figure S4: Plot showing tectonic subsidence data and models as a function of age (small points and curves, respectively), showing the effect of varying sediment grain density on estimates for the age and duration of the Shuram excursion (large points). Red: high-density; blue: intermediate density; green: low density.

Figure S5: Plot showing tectonic subsidence data and models as a function of age (points and curves, respectively), showing the effect of varying the exponential time constant  $\tau$ . Models are fit to the 541 Ma data point and assume intermediate sediment grain density.

Figure S6: Plot showing calculated tectonic subsidence  $Y$  as a function of observed stratigraphic thickness  $S$  for the backstripping and delithification model that includes a hypothetical Pahrump Group substrate below the lowest exposed Johnnie Formation strata (unit A) in the Spring Mountains section. Error bars show range of estimates of  $Y$  produced by a  $\pm 5\%$  variation in sediment grain density.

## TABLES

| Table S1: Chemostratigraphy results                                                                                  |        |                            |                  |                                 |                                 |       |
|----------------------------------------------------------------------------------------------------------------------|--------|----------------------------|------------------|---------------------------------|---------------------------------|-------|
| Unit                                                                                                                 | Sample | Stratigraphic position (m) | Bed position (m) | $\delta^{13}\text{C}$ (‰, VPDB) | $\delta^{18}\text{O}$ (‰, VPDB) | Notes |
| Zjc collection site* located at 36°30'35.05" N, 116°00'58.55" W (within rectangle labeled "Locality A" in Figure 2A) |        |                            |                  |                                 |                                 |       |
| Zjc                                                                                                                  | J72    | -                          | 0.00             | 1.8                             | -14.5                           |       |
|                                                                                                                      | J73    | -                          | 1.00             | 1.6                             | -15.2                           |       |
|                                                                                                                      | J74    | -                          | 2.00             | 1.5                             | -15.1                           |       |
|                                                                                                                      | J75    | -                          | 3.00             | 0.0                             | -16.0                           |       |

|                                                                                                                                                                                                             |     |   |       |      |       |  |
|-------------------------------------------------------------------------------------------------------------------------------------------------------------------------------------------------------------|-----|---|-------|------|-------|--|
| Zjf collected along a transect beginning at 36°28'53.96" N, 116°01'30.13" W; ending at 36°28'53.79" N, 116°01'28.97" W (at the beginning of cross section line B-B' in Figure 3: Johnnie Wash geologic map) |     |   |       |      |       |  |
| Zjf                                                                                                                                                                                                         | J76 | - | 0.00  | 2.1  | -10.1 |  |
|                                                                                                                                                                                                             | J77 | - | 0.50  | 2.0  | -10.9 |  |
|                                                                                                                                                                                                             | J78 | - | 1.00  | 2.1  | -9.6  |  |
|                                                                                                                                                                                                             | J79 | - | 2.00  | 2.2  | -9.7  |  |
|                                                                                                                                                                                                             | J80 | - | 2.50  | 1.2  | -10.7 |  |
|                                                                                                                                                                                                             | J81 | - | 3.00  | 1.7  | -9.6  |  |
|                                                                                                                                                                                                             | J82 | - | 3.50  | 1.6  | -9.2  |  |
|                                                                                                                                                                                                             | J83 | - | 4.00  | 1.7  | -8.9  |  |
|                                                                                                                                                                                                             | J84 | - | 6.00  | 1.6  | -8.4  |  |
|                                                                                                                                                                                                             | J85 | - | 8.00  | 1.9  | -8.5  |  |
|                                                                                                                                                                                                             | J86 | - | 11.00 | -0.9 | -12.8 |  |
|                                                                                                                                                                                                             | J87 | - | 11.50 | 1.3  | -11.9 |  |
|                                                                                                                                                                                                             | J88 | - | 12.00 | 1.5  | -8.8  |  |
|                                                                                                                                                                                                             | J89 | - | 13.50 | 1.5  | -9.2  |  |
|                                                                                                                                                                                                             | J90 | - | 14.00 | 1.6  | -9.7  |  |
|                                                                                                                                                                                                             | J91 | - | 14.50 | 1.7  | -8.2  |  |
|                                                                                                                                                                                                             | J92 | - | 15.00 | 1.5  | -9.1  |  |
|                                                                                                                                                                                                             | J93 | - | 15.50 | 1.0  | -9.2  |  |



|                                                                                                                                          |      |       |       |     |       |  |
|------------------------------------------------------------------------------------------------------------------------------------------|------|-------|-------|-----|-------|--|
|                                                                                                                                          | J94  | -     | 16.50 | 0.8 | -9.2  |  |
|                                                                                                                                          | J95  | -     | 19.00 | 1.0 | -8.4  |  |
|                                                                                                                                          | J96  | -     | 19.50 | 0.8 | -8.5  |  |
|                                                                                                                                          | J97  | -     | 20.00 | 1.1 | -9.4  |  |
|                                                                                                                                          | J98  | -     | 20.50 | 0.9 | -9.8  |  |
|                                                                                                                                          | J99  | -     | 21.00 | 1.0 | -7.8  |  |
|                                                                                                                                          | J100 | -     | 21.50 | 0.6 | -9.4  |  |
|                                                                                                                                          | J101 | -     | 22.00 | 0.6 | -9.6  |  |
|                                                                                                                                          | J102 | -     | 22.50 | 1.6 | -7.7  |  |
|                                                                                                                                          | J103 | -     | 23.00 | 0.4 | -11.3 |  |
|                                                                                                                                          | J104 | -     | 23.50 | 2.8 | -8.4  |  |
|                                                                                                                                          | J105 | -     | 26.00 | 1.5 | -12.7 |  |
|                                                                                                                                          | J106 | -     | 27.00 | 1.8 | -12.4 |  |
|                                                                                                                                          | J107 | -     | 28.00 | 2.0 | -12.9 |  |
| Transect a-a' in Figure 6: Mt. Schader geologic map (begins at 36°27'31.70" N, 116°05'43.38" W; ends at 36°27'30.30" N, 116°05'33.92" W) |      |       |       |     |       |  |
| Zjh                                                                                                                                      | J1   | 63.00 | 0.00  | 1.0 | -6.5  |  |
|                                                                                                                                          | J2   | 63.50 | 0.50  | 0.4 | -7.2  |  |
|                                                                                                                                          | J3   | 64.00 | 1.00  | 1.6 | -6.5  |  |
|                                                                                                                                          | J4   | 64.50 | 1.50  | 2.6 | -6.9  |  |

|  |     |        |      |      |       |  |
|--|-----|--------|------|------|-------|--|
|  | J5  | 87.00  | 0.00 | -1.4 | -5.4  |  |
|  | J6  | 87.50  | 0.50 | -0.3 | -10.6 |  |
|  | J7  | 88.00  | 1.00 | 0.8  | -8.2  |  |
|  | J8  | 88.50  | 1.50 | 1.4  | -9.5  |  |
|  | J9  | 89.00  | 2.00 | 1.5  | -9.5  |  |
|  | J10 | 89.50  | 2.50 | 0.4  | -10.1 |  |
|  | J11 | 90.00  | 3.00 | 0.7  | -7.2  |  |
|  | J12 | 90.50  | 3.50 | 0.0  | -10.9 |  |
|  | J13 | 91.00  | 4.00 | 1.0  | -8.5  |  |
|  | J14 | 91.50  | 4.50 | -0.8 | -11.2 |  |
|  | J15 | 93.00  | 6.00 | 1.2  | -10.6 |  |
|  | J16 | 93.33  | 6.33 | 2.7  | -9.4  |  |
|  | J17 | 93.66  | 6.66 | 0.5  | -10.4 |  |
|  | J18 | 94.00  | 7.00 | 1.9  | -10.2 |  |
|  | J19 | 107.00 | -    | 3.4  | -5.0  |  |
|  | J20 | 109.00 | -    | 2.9  | -6.2  |  |
|  | J21 | 125.75 | -    | 1.3  | -8.8  |  |
|  | J22 | 126.75 | -    | 2.2  | -9.6  |  |
|  | J23 | 140.00 | 0.00 | 2.9  | -7.8  |  |
|  | J24 | 140.50 | 0.50 | 3.9  | -8.4  |  |

|                                                                                                                                          |     |        |      |      |       |  |
|------------------------------------------------------------------------------------------------------------------------------------------|-----|--------|------|------|-------|--|
|                                                                                                                                          | J25 | 141.00 | 1.00 | 3.7  | -9.0  |  |
|                                                                                                                                          | J26 | 141.50 | 1.50 | 3.7  | -10.5 |  |
|                                                                                                                                          | J27 | 142.00 | 2.00 | 2.6  | -11.1 |  |
|                                                                                                                                          | J28 | 142.50 | 2.50 | 2.7  | -11.1 |  |
|                                                                                                                                          | J29 | 143.00 | 3.00 | 3.1  | -10.2 |  |
|                                                                                                                                          | J30 | 143.33 | 3.33 | 2.5  | -8.2  |  |
|                                                                                                                                          | J31 | 143.66 | 3.66 | 3.3  | -7.2  |  |
|                                                                                                                                          | J32 | 144.00 | 4.00 | 2.3  | -7.4  |  |
| Transect b-b' in Figure 6: Mt. Schader geologic map (begins at 36°27'18.37" N, 116°05'39.60" W; ends at 36°27'17.54" N, 116°05'33.18" W) |     |        |      |      |       |  |
| Zji                                                                                                                                      | J33 | 152.00 | -    | -3.7 | -9.9  |  |
|                                                                                                                                          | J34 | 241.00 | 0.00 | 1.4  | -9.1  |  |
|                                                                                                                                          | J35 | 241.50 | 0.50 | 1.4  | -9.7  |  |
|                                                                                                                                          | J36 | 242.75 | 1.75 | 0.0  | -11.4 |  |
|                                                                                                                                          | J37 | 243.25 | 2.25 | 1.2  | -11.5 |  |
|                                                                                                                                          | J38 | 243.50 | 2.50 | 1.6  | -11.2 |  |
|                                                                                                                                          | J39 | 244.00 | 3.00 | 0.6  | -11.4 |  |
| Transect c-c' in Figure 6: Mt. Schader geologic map (begins at 36°26'50.85" N, 116°05'53.02" W; ends at 36°26'45.94" N, 116°05'46.85" W) |     |        |      |      |       |  |
| Zjj                                                                                                                                      | J40 | 284.00 | 0.00 | 1.7  | -8.6  |  |
|                                                                                                                                          | J41 | 284.50 | 0.50 | 1.2  | -7.6  |  |

|     |     |        |      |      |       |  |
|-----|-----|--------|------|------|-------|--|
|     | J42 | 285.00 | 1.00 | 1.6  | -7.6  |  |
|     | J43 | 328.00 | 0.00 | -0.6 | -11.7 |  |
|     | J44 | 328.50 | 0.50 | 0.2  | -9.8  |  |
|     | J45 | 329.00 | 1.00 | -0.6 | -10.1 |  |
|     | J46 | 329.50 | 1.50 | 2.3  | -9.0  |  |
|     | J47 | 330.00 | 2.00 | 2.8  | -10.2 |  |
|     | J48 | 330.50 | 2.50 | 3.2  | -9.7  |  |
|     | J49 | 331.00 | 3.00 | 3.9  | -9.6  |  |
|     | J50 | 332.00 | 4.00 | 3.8  | -9.8  |  |
| Zjk | J51 | 347.50 | 0.00 | 2.3  | -5.0  |  |
|     | J52 | 347.75 | 0.25 | 2.1  | -7.0  |  |
|     | J53 | 348.00 | 0.50 | 2.1  | -7.1  |  |
|     | J54 | 348.50 | 1.00 | 1.4  | -5.4  |  |
|     | J55 | 367.00 | 0.00 | 4.9  | -7.0  |  |
|     | J56 | 367.50 | 0.50 | 4.2  | -8.3  |  |
|     | J57 | 368.00 | 1.00 | 4.5  | -8.2  |  |
|     | J58 | 368.50 | 1.50 | 3.0  | -13.6 |  |
|     | J59 | 369.00 | 2.00 | 3.4  | -10.8 |  |
|     | J60 | 369.50 | 2.50 | 4.1  | -8.2  |  |
|     | J61 | 370.00 | 3.00 | 2.1  | -10.6 |  |

|                                                                                                                                          |     |        |      |      |       |                |
|------------------------------------------------------------------------------------------------------------------------------------------|-----|--------|------|------|-------|----------------|
|                                                                                                                                          | J62 | 370.50 | 3.50 | 1.9  | -10.9 |                |
|                                                                                                                                          | J63 | 371.00 | 4.00 | 1.7  | -8.8  |                |
| Transect d-d' in Figure 6: Mt. Schader geologic map (begins at 36°27'28.71" N, 116°05'16.42" W; ends at 36°27'24.47" N, 116°05'10.44" W) |     |        |      |      |       |                |
| Zjl                                                                                                                                      | J64 | 438.00 | 0.00 | -1.0 | -7.3  |                |
|                                                                                                                                          | J65 | 438.50 | 0.50 | -0.2 | -6.9  |                |
|                                                                                                                                          | J66 | 439.00 | 1.00 | -0.6 | -7.7  |                |
|                                                                                                                                          | J67 | 439.50 | 1.50 | -0.6 | -8.3  |                |
|                                                                                                                                          | J68 | 440.00 | 2.00 | -1.9 | -7.0  |                |
| Zjr                                                                                                                                      | J69 | 457.00 | 0.00 | -3.2 | -7.2  | Johnnie oolite |
|                                                                                                                                          | J70 | 458.00 | 1.00 | -4.0 | -9.8  |                |
|                                                                                                                                          | J71 | 459.00 | 2.00 | -4.4 | -8.7  |                |
| *All locations recorded using GPS with the WGS84 coordinate system                                                                       |     |        |      |      |       |                |

56

| Table S2: All ages modeled using hypothetical Pahrump Group substrate |          |                 |     |     |                |     |     |                |     |     |
|-----------------------------------------------------------------------|----------|-----------------|-----|-----|----------------|-----|-----|----------------|-----|-----|
|                                                                       |          | Model ages (Ma) |     |     |                |     |     |                |     |     |
|                                                                       |          | $\tau = 55$ my  |     |     | $\tau = 60$ my |     |     | $\tau = 65$ my |     |     |
| Unit                                                                  | Age (Ma) | Min             | Int | Max | Min            | Int | Max | Min            | Int | Max |
| MzPzco                                                                | ~243     | -               | -   | -   | -              | -   | -   | -              | -   | -   |
| Ddg                                                                   | 359      | -               | -   | -   | -              | -   | -   | -              | -   | -   |

|       |     |     |     |     |     |     |     |     |     |     |
|-------|-----|-----|-----|-----|-----|-----|-----|-----|-----|-----|
| Dn    | 383 | -   | -   | -   | -   | -   | -   | -   | -   | -   |
| Dl    | 393 | 342 | 327 | 288 | 324 | 307 | 265 | 306 | 288 | 242 |
| Sl    | 419 | 364 | 349 | 310 | 348 | 332 | 289 | 331 | 314 | 268 |
| Oes   | 444 | 378 | 365 | 318 | 363 | 349 | 298 | 348 | 333 | 278 |
| Oe    | 458 | 393 | 379 | 332 | 380 | 364 | 313 | 366 | 350 | 294 |
| Op1   | 470 | 436 | 429 | 413 | 427 | 419 | 401 | 417 | 409 | 390 |
| OEn1  | 485 | 468 | 460 | 440 | 461 | 452 | 431 | 454 | 445 | 422 |
| Ebk1  | 497 | 481 | 470 | 442 | 475 | 464 | 433 | 470 | 457 | 424 |
| Ecl   | 509 | 513 | 507 | 492 | 511 | 504 | 488 | 508 | 501 | 483 |
| EZwc1 | 541 | 541 | 541 | 541 | 541 | 541 | 541 | 541 | 541 | 541 |
| Zse   | -   | 545 | 546 | 547 | 546 | 546 | 548 | 546 | 547 | 548 |
| Zsd   | -   | 554 | 556 | 560 | 556 | 558 | 561 | 557 | 559 | 563 |
| Zsc   | -   | 554 | 556 | 560 | 556 | 558 | 562 | 557 | 559 | 563 |
| Zsb   | -   | 559 | 562 | 566 | 561 | 563 | 568 | 562 | 565 | 571 |
| Zsa   | -   | 561 | 564 | 569 | 563 | 566 | 571 | 565 | 568 | 574 |
| Zjr2  | -   | 569 | 572 | 579 | 571 | 575 | 582 | 574 | 578 | 585 |
| Zjr1  | -   | 573 | 577 | 584 | 576 | 580 | 588 | 579 | 584 | 592 |
| Zjl   | -   | 574 | 577 | 584 | 577 | 581 | 588 | 580 | 584 | 592 |
| Zjk   | -   | 575 | 579 | 586 | 578 | 582 | 590 | 581 | 586 | 594 |
| Zjj   | -   | 577 | 581 | 588 | 580 | 584 | 592 | 583 | 588 | 596 |

|        |       |     |     |     |     |     |     |     |     |     |
|--------|-------|-----|-----|-----|-----|-----|-----|-----|-----|-----|
| Zji    | -     | 580 | 585 | 592 | 584 | 589 | 597 | 587 | 592 | 602 |
| Zjh    | -     | 581 | 586 | 594 | 585 | 590 | 598 | 588 | 594 | 603 |
| Zjg    | -     | 582 | 587 | 595 | 586 | 591 | 600 | 590 | 595 | 605 |
| Zjf    | -     | 584 | 589 | 598 | 588 | 594 | 603 | 592 | 598 | 608 |
| Zje    | -     | 585 | 590 | 598 | 589 | 594 | 603 | 593 | 599 | 608 |
| Zjd    | -     | 590 | 595 | 604 | 594 | 600 | 609 | 598 | 605 | 615 |
| Zjc2   | -     | 594 | 600 | 609 | 599 | 605 | 616 | 604 | 611 | 622 |
| Zjc1   | -     | 595 | 601 | 610 | 600 | 606 | 617 | 605 | 612 | 623 |
| Zjb    | -     | 596 | 602 | 611 | 601 | 607 | 618 | 606 | 613 | 624 |
| Zja    | -     | 598 | 604 | 614 | 603 | 610 | 621 | 609 | 616 | 627 |
| Zjt    | -     | 600 | 606 | 616 | 605 | 612 | 623 | 611 | 618 | 630 |
| Zkpw   | 635   | 602 | 608 | 618 | 607 | 614 | 625 | 613 | 620 | 632 |
| Zkpth  | -     | 603 | 609 | 620 | 609 | 615 | 627 | 614 | 622 | 634 |
| Zkpmg  | -     | 604 | 610 | 621 | 610 | 617 | 628 | 615 | 623 | 635 |
| Zkpsmp | -     | 605 | 612 | 622 | 611 | 618 | 630 | 617 | 625 | 637 |
| Zkpls  | -     | 608 | 615 | 626 | 615 | 622 | 634 | 621 | 629 | 641 |
| Zbs    | -     | 614 | 621 | 633 | 621 | 628 | 641 | 627 | 636 | 649 |
| Zhs    | <787  | 616 | 623 | 635 | 623 | 631 | 643 | 630 | 638 | 652 |
| Ycs2   | >1087 | 619 | 627 | 638 | 626 | 634 | 647 | 633 | 642 | 656 |
| Ycs1   | -     | 621 | 629 | 641 | 629 | 637 | 650 | 636 | 645 | 659 |

|        |   |     |     |     |     |     |     |     |     |     |
|--------|---|-----|-----|-----|-----|-----|-----|-----|-----|-----|
| (base) | - | 628 | 637 | 649 | 636 | 645 | 659 | 644 | 654 | 669 |
|--------|---|-----|-----|-----|-----|-----|-----|-----|-----|-----|

## SUPPLEMENTAL TEXT

Lithologic descriptions regarding the Mt. Schader stratigraphic section for the Ediacaran Johnnie Formation, Montgomery Mountains, Nevada

Thickness of stratigraphic units were measured with a Jacob's staff and recorded to the nearest 1/4 or 1/3 of a meter. Care was taken to avoid structural complexities (i.e. by moving to locations where faults and/or folds are not present). Color names and numerical designations were recorded using a Geological Society of America Rock Color Chart with genuine Munsell® color chips. Grain sizes were recorded using an American/Canadian Stratigraphic reference card. Bed thicknesses use the following general designations: thin, <20 centimeters; medium, >20 centimeters; and thick, >50 centimeters. Total thickness of section measured is 538 meters for the Johnnie Formation, and 54 meters for the Stirling Quartzite (grand total of 592 meters).



72  
73  
74  
75  
76  
77  
78  
79  
80  
81  
82  
83  
84  
85  
86  
87  
88  
89  
90  
91  
92

**Locality 1 (section 4, d-d')**

*Northeast part of Montgomery Mountains, measured about 3 kilometers west/southwest of Mt. Schader, starting at UTM zone 11S 0581729 m E 4035133 m N, and ending at UTM zone 11S 0581879 m E 4035004 m N.*

Stirling Quartzite (incomplete):

Zsa member (incomplete):

*Meters*

48. Breccia and conglomerate. Breccia and conglomerate are very pale orange (10YR 8/2); weather to dark yellowish orange (10YR 6/6) and grayish black (N2); grains are poorly sorted coarse sand, pebbles, gravel; massive bedding; irregular cliff-forming protrusions; slickenlines on slickensided surfaces. Samples 20BW15 (590 m breccia) and 21BW15 (591 m). Incomplete measurement of bed.

4

47. Massive orthoquartzite. Orthoquartzite is pinkish gray (5YR 8/1); weathers to moderate yellowish orange (10YR 7/6); medium-coarse well-sorted grains; massive bedding with conjugate fractures; some cliff-forming protrusions on mostly recessive slopes. Sample 19BW15 (583 m-orthoquartzite).

|     |                                                                         |       |
|-----|-------------------------------------------------------------------------|-------|
| 93  |                                                                         | 14    |
| 94  | 46. Dolomitic sandstone. Dolomitic sandstone is grayish orange pink     |       |
| 95  | (5YR 7/2); weathers to grayish brown (5YR 3/2); fine-grained; laminated |       |
| 96  | medium beds; trough cross strata; resistant cliff-forming unit.         |       |
| 97  |                                                                         | 8     |
| 98  | 45. Orthoquartzite and carbonate cemented sandstone. Orthoquartzite is  |       |
| 99  | very pale orange (10YR 8/2); weathers to dark yellowish orange (10YR    |       |
| 100 | 6/6); fine- to medium-grained; thick bedded; some laminations with      |       |
| 101 | fractures both along laminations and sub-orthogonal to laminations;     |       |
| 102 | channel fill with normal grading near base. Carbonate cemented          |       |
| 103 | sandstone is pale reddish brown (10R 5/4); weathers to olive black (5Y  |       |
| 104 | 2/1); fine-grained; medium-thick bedded; sometimes laminated.           |       |
| 105 |                                                                         | 28    |
| 106 |                                                                         | ----- |
| 107 | Total of incomplete Zs member                                           | 54    |
| 108 |                                                                         | ----- |
| 109 | Total of incomplete Stirling Quartzite                                  | 54    |
| 110 |                                                                         |       |
| 111 | Johnnie Formation (incomplete):                                         |       |
| 112 | Zjr member:                                                             |       |

113

114 44. Sandstone and siltstone in ball-and-pillow structure, and dolostone.

115 Ball-and-pillow structure is 1-2 m thick; light brown (5YR 6.4); weathers

116 to dusky yellowish brown (10YR 2/2); sandstone is fine- to medium-

117 grained; siltstone casted around sandstone. Other sandstone is pale red

118 (5R 6/2); weathers to dark yellowish orange (10YR 6/6); fine-grained;

119 medium bedded. Siltstone is typical VSS with additional new hue of pale

120 red (5R 6/2); weathers to light greenish gray (5GY 8/1); speckled by 1

121 mm hematite grains; laminated. Dolostone is medium light gray (N6);

122 weathers to yellowish orange (10YR 6/6) and light brown (5YR 6/4). Base

123 of dolomitic sandstone is moderate yellowish brown (10YR 5/4);

124 weathers to dusky yellowish brown (10YR 2/2) medium grains; some

125 south-dipping foresets.

126 4

127 43. VSS and calcite-cemented sandstone. VSS as previous. Sandy

128 limestone is pale red (10R 6/2); weathers to pale reddish brown (10R 5/4);

129 very fine-grained; thin lenses of flaser beds.

130 8

131 42. Limestone breccia and sucrosic limestone. Limestone breccia is light

132 gray (N7); weathers to light olive gray (5Y 5/2). Sucrosic limestone is

133 pale red (10R 6/2); weathers to pale reddish brown (10R 5/4). Sandy

|     |                                                                            |      |
|-----|----------------------------------------------------------------------------|------|
| 134 | limestone and calcite cemented sandstone with laminated thin interbeds     |      |
| 135 | of sucrosic limestone; recessive, slope-forming unit.                      |      |
| 136 |                                                                            | 24   |
| 137 | 41. Mixed siltstone and carbonate-rich sandstone. Siltstone as VSS; finely |      |
| 138 | laminated. Sandstone is pale red (10R 6/2); weathers to dark yellowish     |      |
| 139 | brown (10YR 4/2); fine-grained, thin- to medium-bedded. Siltstone and      |      |
| 140 | sandstone form recessive slope-forming unit.                               |      |
| 141 |                                                                            | 18   |
| 142 | 40. Argillite and limestone. Argillite is medium dark gray (N4); weathers  |      |
| 143 | to medium gray (N5); very fine mica, phyllitic texture. Limestone is       |      |
| 144 | laminated, as in unit 38.                                                  |      |
| 145 |                                                                            | 5    |
| 146 | 39. Folded limestone. Same as liver limestone (38): pale reddish brown     |      |
| 147 | (10R 5/4); weathers to grayish red (10R 4/2); varnish is very dusky red    |      |
| 148 | (10R 2/2); folded top to west, pitted dissolution surfaces.                |      |
| 149 |                                                                            | 1    |
| 150 | 38. Liver limestone. Limestone is pale reddish brown (10R 5/4); weathers   |      |
| 151 | to grayish red (10R 4/2). Fine-grained with interspersed quartz grains;    |      |
| 152 | thinly to medium bedded, massive to laminated beds; occasional             |      |
| 153 | brecciation near top.                                                      |      |
| 154 |                                                                            | 11.5 |

|     |                                                                         |                        |
|-----|-------------------------------------------------------------------------|------------------------|
| 155 | 37. Carbonate-rich sandstone. Sandstone is grayish red (10R 4/2);       |                        |
| 156 | weathers to pale reddish brown (10R 5/4) and dark yellowish orange      |                        |
| 157 | (10YR 6/6) and various similar hues; fine-medium grains; thinly bedded  |                        |
| 158 | and finely laminated with rare north-dipping foresets.                  |                        |
| 159 |                                                                         | 7.5                    |
| 160 | 36. Dolomitic oolite; “Johnnie Oolite”. Oolite is pale yellowish brown  |                        |
| 161 | (10YR 6/2); weathers to grayish orange (10YR 7/4); very coarse-grained. |                        |
| 162 |                                                                         | 2                      |
| 163 | 35. VSS. VSS is finely laminated, occasionally phyllitic, with rare N-  |                        |
| 164 | dipping foresets and occasional quartz veins.                           |                        |
| 165 |                                                                         | 17                     |
| 166 |                                                                         | -----                  |
| 167 |                                                                         | Total of Zjr member 98 |
| 168 |                                                                         |                        |
| 169 | Zjl member (combine with Zjl from section 3):                           |                        |
| 170 |                                                                         |                        |
| 171 | 34. Laminated dolostone. Dolostone is pale yellowish brown (10YR 6/2);  |                        |
| 172 | weathers to moderate yellowish brown (10YR 6/4); thick, laminated beds. |                        |
| 173 |                                                                         | 2                      |

174 33. VSS and dolomitic sandstone (incomplete). VSS as previous.  
175 Dolomitic sandstone is medium gray (N5); weathers to moderate  
176 yellowish orange (10YR 5/6); fine-grained. Beds are massive with varnish  
177 of dark gray (N3).

178 6

179

|     |                                                                                                  |               |
|-----|--------------------------------------------------------------------------------------------------|---------------|
| 180 | <b>Locality 1 (section 3, c-c')</b>                                                              |               |
| 181 |                                                                                                  |               |
| 182 | <i>Northeast part of Montgomery Mountains, measured about 3 kilometers west/southwest of Mt.</i> |               |
| 183 | <i>Schader, starting at UTM zone 11S 0580829 m E 4033958 m N (approximate), and ending at</i>    |               |
| 184 | <i>UTM zone 11S 0580984 m E 4033808 m N.</i>                                                     |               |
| 185 |                                                                                                  |               |
| 186 |                                                                                                  | <i>Meters</i> |
| 187 | Johnnie Formation (incomplete):                                                                  |               |
| 188 | Zjl member (combine with Zjl from section 4):                                                    |               |
| 189 |                                                                                                  |               |
| 190 | 32. Orthoquartzite and siltstone (VSS) as in 31. Sample 18BW15 (430 m),                          |               |
| 191 | medium-grained orthoquartzite (incomplete).                                                      |               |
| 192 |                                                                                                  | 36            |
| 193 | 31. Orthoquartzite and minor siltstone. Light brownish gray (5YR 6/1);                           |               |
| 194 | weathers to moderate brown (5YR 4/4) and grayish black (N2); siltstone                           |               |
| 195 | is fine-medium grained; thin-thick parallel beds with some hummocky                              |               |
| 196 | cross-strata.                                                                                    |               |
| 197 |                                                                                                  | 12            |
| 198 | 30. Siltstone and fine sandstone with minor orthoquartzite. Siltstone and                        |               |
| 199 | fine sandstone, as VSS, are variegated; bluish white (5B 4/1) weathers to                        |               |

|     |                                                                           |                        |
|-----|---------------------------------------------------------------------------|------------------------|
| 200 | blackish red (5R 2/2) and green (undocumented), thin beds.                |                        |
| 201 | Orthoquartzite is medium light gray (N6); weathers to moderate reddish    |                        |
| 202 | brown (10R 4/6).                                                          |                        |
| 203 |                                                                           | 13                     |
| 204 |                                                                           | -----                  |
| 205 |                                                                           | Total of Zjl member 69 |
| 206 |                                                                           |                        |
| 207 | Zjk member:                                                               |                        |
| 208 |                                                                           |                        |
| 209 | 29. Dolostone with chert. Dolostone is medium gray (N5); weathers to      |                        |
| 210 | light olive gray (5Y 5/2) and medium yellowish brown (10YR 6/4).          |                        |
| 211 | Dolostone is medium bedded with chert in lower third of section. Chert is |                        |
| 212 | medium light gray (N6); weathers to grayish black (N2). Hummocky          |                        |
| 213 | cross-stratified mounds with anastomosing laminations in middle of        |                        |
| 214 | section. Samples J63 (371 m), J62 (370.5 m), J61 (370), J60 (369.5), J59  |                        |
| 215 | (369), J58 (368.5), J57 (368), J56 (367.5), and J55 (367).                |                        |
| 216 |                                                                           | 4                      |
| 217 | 28. Siltstone and orthoquartzite, mainly parallel bedded.                 |                        |
| 218 |                                                                           | 18                     |



219 27. Dolostone. Medium gray (N5); weathers to moderate olive brown (5Y  
220 4/4) and moderate yellowish brown (10YR 5/4). Medium bedded with  
221 basal sandy dolostone. Samples J54 (349 m), J53 (348.5 m), J52 (348 m),  
222 and J51 (347.5 m).

223 2

224 26. Siltstone and orthoquartzite. Siltstone is typical variegates sandstone  
225 and siltstone, bluish white (5B 4/1) and blackish red (5R 2/2) and green  
226 (undocumented color), thinly bedded with thin beds or orthoquartzite.  
227 Orthoquartzite is medium light gray (N6); weathers to moderate reddish  
228 brown (10R 4/6), ripple laminations.

229 15

230 -----

231 Total of Zjk member 39

232

233 Zjj member (combine with Zjj from section 2):

234

235 25. Dolostone and sandy dolostone. Dolostone is medium-dark gray (N4);  
236 weathers to olive gray (5Y 4/1); medium-thick bedded; some hummocky  
237 cross-stratified structures. Sandy dolostone is medium gray (N6-N8);  
238 weathers medium yellowish brown (10 YR 5/4); medium-thick beds with  
239 pure dolostone blebs and no chert. Samples J50 (332 m), J49 (331.5 m),

240 J48 (331 m), J47 (330.5 m), J46 (330 m), J45 (329.5 m), J44 (329 m), and  
241 J43 (328.5 m).

242 5

243 24. Orthoquartzite and Siltstone. 2-4 m thick orthoquartzite and siltstone  
244 beds in rhythmic sets every 5 m. Siltstone coarsens upward into top (final)  
245 orthoquartzite bed.

246 23

247 23. Siltstone and sandstone. Siltstone is variegated (variegated sandstone  
248 and siltstone=VSS); mainly bluish white (5B 4/1); weathers to blackish  
249 red (5R 2/2); also typically green (undocumented color); thinly bedded.  
250 Sandstone is orthoquartzite; medium light gray (N6); weathers to  
251 moderate reddish brown (10R 4/6); minor in abundance.

252 19

253 22. Dolomitic sandstone marker bed. Light olive gray (5Y 6/1); weathers  
254 to moderate brown (5YR 4/6); fine to medium sand; some hummocky  
255 cross stratification (HCS). Samples J42 (285 m), J41 (284.5 m), and J40  
256 (284 m).

257 1

258 21. (combine with unit 21 in section 2) Orthoquartzite, sandstone and  
259 siltstone. Orthoquartzite is medium light gray (N6); weathers to moderate  
260 reddish brown (10R 4/6); fine sand; thickly bedded. Sandstone and

261 siltstone are variegated (VSS); “both “green-brown” and “lt. blue-red”  
262 shades of variegation present in VSS”-green color undocumented; bluish  
263 white (5B 4/1); weathers to blackish red (5R 2/2); fine sand; thinly  
264 bedded; some hummocky cross stratification (HCS).

265

27

266

267  
268  
269  
270  
271  
272  
273  
274  
275  
276  
277  
278  
279  
280  
281  
282  
283  
284  
285  
286

**Locality 1 (section 2, b-b')**

*Northeast part of Montgomery Mountains, measured about 3 kilometers west/southwest of Mt. Schader, starting at UTM zone 11S 0581155 m E 4034809 m N, and ending at UTM zone 11S 0581315 m E 4034785 m N.*

*Meters*

Johnnie Formation (incomplete):

Zjj member (combine with Zjj in section 3):

21. (combine with unit 21 in section 3) Orthoquartzite, sandstone and siltstone. Orthoquartzite is medium light gray (N6); weathers to moderate reddish brown (10R 4/6); fine sand; thickly bedded. Sandstone and siltstone are variegated (VSS); “typical green fine sand of VSS”-green color undocumented; thinly bedded. Samples 17-BW-15 (247 m-sandstone) and 16-BW-15 (246.5 m-siltstone).

13

-----

Total of Zjj member 88

Zji member (also see Zji from section 1):

20. Dolomitic sandstone. Medium gray (N5); weathers to pale reddish-brown (10R 5/4) and moderate yellowish-brown (10YR 5/4); fine to medium sand; medium bedded. Hummocky cross stratification (HCS), with an east-west trend in one well-exposed hummock. Samples J39 (244 m), J38 (243.5 m), J37 (243.25 m), J36 (242.75), J35 (241.5 m), J34 (241 m), and 15-BW-15 (242 m-dolomitic sandstone).

3

19. Orthoquartzite and siltstone. Orthoquartzite is medium light gray (N6); weathers to moderate reddish brown (10R 4/6); fine sand; thickly bedded. Siltstone has some sandstone (~25%) and is variegated (VSS); mainly bluish white (5B 4/1); weathers to blackish red (5R 2/2); fine sand; medium bedded. Orthoquartzite and siltstone occur in relative abundances of 75%/25% (respectively) throughout this section. Hummocky cross stratification is very prominent at ~190 m (most sandstone beds involved) and good hummocks in cross section at ~184 m; sandstone is more commonly medium-grained and micaceous at ~210 m; conspicuous thickly bedded intervals in 5-10 m cycles begin at ~215 m and continue through ~240 m. Sample 14-BW-15 (210.5 m-orthoquartzite; light purplish gray (5P 8/1); weathers to dark yellowish brown (10YR 4/4) and dusky yellowish brown (10YR 2/2); medium sand; thickly bedded).

309 Thickness is approximate; contact is covered in talus; bed surfaces in the  
310 float contain asymmetric ripples.

311 63

312 18. Orthoquartzite and siltstone. Orthoquartzite is grayish red (5R 4/2);  
313 weathers to very dusky red (10R 2/2); fine to medium sand (borderline);  
314 bedding thickness unknown. Siltstone is variegated (VSS); mainly blush  
315 white (5B 4/1); weathers to blackish red (5R 2/2); thinly bedded. Siltstone  
316 occurs in decimeter partings on ~30-70 cm sandstone beds.

317 14

318 17. Sandstone (dolomitic at the base of this unit) and siltstone. Sandstone  
319 can be light bluish gray (Munsell code unknown), grayish red purple (5RP  
320 4/2) where carbonate-poor, and light brown (5YR 5/6) where carbonate-  
321 rich; weathers to moderate yellowish brown (10YR 5/4) where carbonate-  
322 poor, and moderate/light brown (5YR 4/6) where carbonate-rich; fine to  
323 medium sand; medium to thickly bedded. Siltstone is variegated (VSS);  
324 mainly bluish white (5B 4/1); weathers to blackish red (5R 2/2); thinly  
325 bedded. Carbonate cement occurs in lowest 2-3 sand beds; some  
326 hummocks observed, mainly parallel laminations. Sample J33 (152 m).

327 20

328

329  
330  
331  
332  
333  
334  
335  
336  
337  
338  
339  
340  
341  
342  
343  
344  
345  
346  
347  
348  
349

Zji member (also see Zji from section 2):

*Meters*

16. Orthoquartzite and siltstone. Orthoquartzite is light gray (N7); weathers to brownish black (5YR 2/1); fine to medium sand; thin to medium bedded, mainly low angle hummocky cross stratification and parallel lamination. Siltstone is variegated (VSS); mainly medium to light bluish gray (5B 6/1), moderate red (5R 4/3 or 5R 5/4?), grayish orange pink (5YR 7/2), and grayish orange (10YR 7/4); weathers to light greenish gray (5GY 8/1), and brownish gray (5YR 4/1); laminated to massive. At the bottom, mainly low angle hummock cross stratification and parallel lamination; at the top, unit forms uniform, fairly steep hillsides and is predominantly parallel bedded with some hummocky cross stratification. Sample 13-BW-15 (198 m-coarse orthoquartzite from highest thick bed).

350 Note: unit 16 is omitted because for section 2, we restart at the base of the  
351 Zji member and repeat the same stratigraphy.

352 (58)

353 -----

354 Total of Zji member 100

355

356 Zjh member:

357

358 15. Dolostone; medium gray (N5) and dark gray (N3); weathers to  
359 moderate yellow brown (10YR 5/4) and medium gray (N5); fine-grained  
360 to sucrosic; thickly bedded. Some evidence of hummocky cross  
361 stratification, but not as pronounced as in lower carbonate. "Colors vary;  
362 reddish gray top and bottom from alteration; more conspicuous here than  
363 in most markers." Samples J32 (144 m), J31 (143.66 m), J30 (143.33 m),  
364 J29 (143 m), J28 (142.5 m), J27 (142 m), J26 (141.5 m), J25 (141 m), J24  
365 (140.5 m), and J23 (140 m).

366 5

367 14. Sandstone and siltstone. Sandstone is medium light gray (N6);  
368 weathers to brownish gray (5YR 4/1); fine sand; thin to medium bedded.  
369 Siltstone is variegated (VSS); mainly medium to light bluish gray (5B  
370 6/1), moderate red (5R 4/3 or 5R 5/4?), grayish orange pink (5YR 7/2),



371 and grayish orange (10YR 7/4); weathers to light greenish gray (5GY 8/1),  
372 and brownish gray (5YR 4/1); laminated to massive. Mainly parallel  
373 bedding.

374 12.25

375 13. Sandy limestone; medium reddish brown (10R 4/6) and moderate  
376 yellowish brown (10YR 5/4); weathers to moderate brown (10YR 5/4);  
377 fine sand; medium bedded. No well-developed lamination or internal  
378 structure. Samples J22 (126.75 m), and J21 (125.75 m).

379 1

380 12. Very fine sandstone (vfs) and siltstone. Very fine sandstone is medium  
381 light gray (N6); weathers to dusky yellowish brown (10YR 2/2); thinly  
382 bedded. Siltstone has several “modes”: brown and light green (Munsell  
383 codes unknown); pale red and light green (Munsell codes unknown).  
384 Photo of light green and red vfs at ~118 m.

385 14.75

386 11. Sandstone with minor carbonate (carbonate occurs in two separate  
387 decimeter-scale beds). Sandstone is light bluish gray (5B 7/1); weathers  
388 to grayish orange (10YR 7/4) or light brown (5YR 5/6); fine sand; thinly  
389 to medium bedded. Carbonate is grayish red (5R 4/2); weathers to grayish  
390 red (10R 4/2); fine sand; thinly to medium bedded. Overall, this unit forms  
391 a resistant interval; mostly parallel bedded with some cross stratification;  
392 intense hummocky cross stratification (HCS); hummocks are apparently

393 cross-stratified with decimeter-scale “mounds” similar to unit 9  
394 carbonates. Samples J20 (109 m; moderate yellowish brown (10YR 5/4);  
395 weathers to moderate brown (5YR 5/4)), and J19 (107 m).

396 7

397 10. Very fine/fine sandstone and siltstone. Very fine/fine sandstone is pale  
398 yellowish brown (10YR 6/2); weathers to dark yellowish brown (10YR  
399 4/2); thinly bedded. Siltstone is variegated (VSS); mainly light bluish gray  
400 (5B 6/1), moderate red (5R 4/3 or 5R 5/4?), grayish orange pink (5YR  
401 7/2), and grayish orange (10YR 7/4); weathers to light greenish gray (5GY  
402 8/1), and brownish gray (5YR 4/1); laminated to massive. Photo of  
403 “brown-light green VSS” at ~96 m.

404 10

405 9. Stromatolitic dolostone; light olive gray (N4 or 5Y 6/1) or grayish red  
406 (10R 4/2); weathers to light olive gray (N5) or moderate yellowish brown  
407 (10YR 5/4); “macroscopically, unit tends to whether brown, lesser olive  
408 gray”; fine-grained/very fine-grained to micritic; medium to thickly  
409 bedded. Dolostone is laminated with variably steep-sided mound  
410 structures ~0.5-1 m across (three photos at ~89 m and ~92 m). Truncations  
411 of mounds observed at bedding interfaces. Samples J18 (94 m), J17 (93.66  
412 m), J16 (93.33 m), J15 (93 m), J14 (91.5 m), J13 (91 m), J12 (90.5 m),  
413 J11 (90 m), J10 (89.5 m), J9 (89 m), J8 (88.5 m), J7 (88 m), J6 (87.5 m),  
414 and J5 (87 m).

|     |                                                                             |      |
|-----|-----------------------------------------------------------------------------|------|
| 415 |                                                                             | 7    |
| 416 | 8. Sandstone; thin to medium beds are medium light gray (N6), and           |      |
| 417 | weather to medium dark gray (N4) or moderate yellowish brown (10YR          |      |
| 418 | 6/4); basal bed is light greenish gray (5GY 6/1), and weathers to dark      |      |
| 419 | greenish gray (5GY 4/1); fine to medium sand. Inconspicuous                 |      |
| 420 | orthoquartzites, sandstone, and variegated sandstones and siltstones        |      |
| 421 | (VSS) occur near the top of this unit; near the bottom, sands are thinly    |      |
| 422 | bedded with no/minor cross stratification (not orthoquartzite, somewhat     |      |
| 423 | friable and porous in places).                                              |      |
| 424 |                                                                             | 18.5 |
| 425 | 7. Very fine sandstone and siltstone. Very fine sandstone is light purplish |      |
| 426 | blue (5PB 8/1), or “white”; weathers to dark reddish brown (10R 4/4);       |      |
| 427 | thinly to medium bedded. Siltstone is variegated (VSS); mainly light        |      |
| 428 | bluish gray (5B 6/1), moderate red (5R 4/3 or 5R 5/4?), grayish orange      |      |
| 429 | pink (5YR 7/2), and grayish orange (10YR 7/4); weathers to light greenish   |      |
| 430 | gray (5GY 8/1), and brownish gray (5YR 4/1); laminated.                     |      |
| 431 |                                                                             | 4    |
| 432 | 6. Dolostone; dark gray (N3); weathers to moderate yellowish brown          |      |
| 433 | (10YR 5/4); fine-grained; medium bedded with laminations and thin (~1-      |      |
| 434 | 2 cm) siliceous stringers; some dispersed quartz grains; complex            |      |
| 435 | structures; disruptions in laminations. Samples J4 (64.5 m), J3 (64 m), J2  |      |
| 436 | (63.5 m), and J1 (63 m).                                                    |      |

|     |                                                                             |       |
|-----|-----------------------------------------------------------------------------|-------|
| 437 |                                                                             | 1.5   |
| 438 | 5. Very fine sandstone and siltstone. Very fine sandstone is light purplish |       |
| 439 | blue (5PB 8/1), or “white”; weathers to dark reddish brown (10R 4/4);       |       |
| 440 | thinly to medium bedded; interbeds are massively textured, with a fair      |       |
| 441 | degree of induration. Siltstone is variegated (VSS); mainly light bluish    |       |
| 442 | gray (5B 6/1), moderate red (5R 4/3 or 5R 5/4?), grayish orange pink        |       |
| 443 | (5YR 7/2), and grayish orange (10YR 7/4); weathers to light greenish gray   |       |
| 444 | (5GY 8/1), and brownish gray (5YR 4/1); laminated. Overall, this is a       |       |
| 445 | recessive, slope-forming unit.                                              |       |
| 446 |                                                                             | 17.5  |
| 447 | 4. Orthoquartzite and very fine sandstone/siltstone. Orthoquartzite is      |       |
| 448 | medium light gray (N6); weathers to medium gray (N5); fine to medium        |       |
| 449 | sand; thickly bedded at base, medium to thinly bedded higher in unit;       |       |
| 450 | heavy desert varnish and cross-stratified higher in unit; silty “caps” on   |       |
| 451 | sandstone beds have abundant grooves/tool-markings, and small current       |       |
| 452 | ripples. Very fine sandstone/siltstone can be moderate red/grayish red (5R  |       |
| 453 | 4/3), light brown (5YR 5/6), or medium light bluish gray (5B 6/1);          |       |
| 454 | weathers to moderate red/grayish red (5R 4/3), moderate brown (5YR          |       |
| 455 | 4/4), or light greenish gray (5GY 8/1) and darker hues. Generally,          |       |
| 456 | orthoquartzite is resistant, while very fine sandstone is recessive.        |       |
| 457 |                                                                             | 6.5   |
| 458 |                                                                             | ----- |

459 Total of Zjh member 105

460

461 Zjg member (incomplete)

462

463 3. Interstratified variegated sandstone and siltstone (VSS), and  
464 orthoquartzite. Siltstone has various hues and is “patchy” or “pinstriped”;  
465 hues include medium light bluish gray (5B 6/1), grayish orange pink (5YR  
466 7/2), and grayish orange (10YR 7/4); weathers to brownish gray (5YR  
467 4/1), light greenish gray (5GY 8/1), and darker hues. Sandstone is  
468 moderate red to grayish red (5R 4/3); weathers to moderate red/grayish  
469 red (5R 4/3); fine-grained. VSS is interstratified on the cm-scale.  
470 Orthoquartzite is medium gray (N6); weathers to medium dark gray (N4);  
471 thinly to medium bedded; 0.5 m foresets with steeply truncated  
472 laminations observed near base at ~16 m. VSS is generally recessive and  
473 slope-forming unit; orthoquartzite beds are resistant.

474 22

475 2. Orthoquartzite; medium light gray (N6); weathers to medium dark gray  
476 (N4); thinly bedded. Thickness of this unit is certainly >2 m because there  
477 is a minor break in section (due to poor exposure).

478 2

|     |                                                                          |       |
|-----|--------------------------------------------------------------------------|-------|
| 479 | 1. Interstratified variegated sandstone and siltstone (VSS), and         |       |
| 480 | orthoquartzite. Sandstone is light brown (5YR 5/6); weathers to moderate |       |
| 481 | brown (5YR 4/4); medium to fine sand; thinly to medium bedded.           |       |
| 482 | Siltstone is medium to light bluish gray (5B 6/1); weathers to light     |       |
| 483 | greenish gray (5GY 8/1) and darker hues; laminated to massive.           |       |
| 484 | Orthoquartzite is medium gray (N6); weathers to medium dark gray (N4);   |       |
| 485 | medium sand; thin to medium parallel bedding, with low-angle trough      |       |
| 486 | cross stratification observed at ~3 m.                                   |       |
| 487 |                                                                          | 15    |
| 488 |                                                                          | ----- |
| 489 | Total of incomplete Zjg member                                           | 39    |
| 490 |                                                                          | ----- |
| 491 | Total of incomplete Johnnie Formation                                    | 538   |
| 492 |                                                                          |       |
